# Supplementary material for: The role of carbon catalyst coatings in the electrochemical water splitting reaction
Source: Springer Nature journal article supplement (doi:10.1038/s41467-025-59740-z), 2025-05-14
Supplement: MOESM1 [file 41467_2025_59740_MOESM1_ESM.pdf]

# The Role of Carbon Catalyst Coatings in the Electrochemical Water Splitting Reaction

William J. V. Townsend, Diego López-Alcalá, Matthew Bird, Jack W. Jordan, Graham A. Rance, Johannes Biskupek, Ute Kaiser, José J. Baldoví, Darren Walsh, Lee Johnson, Andrei N. Khlobystov, Graham N. Newton

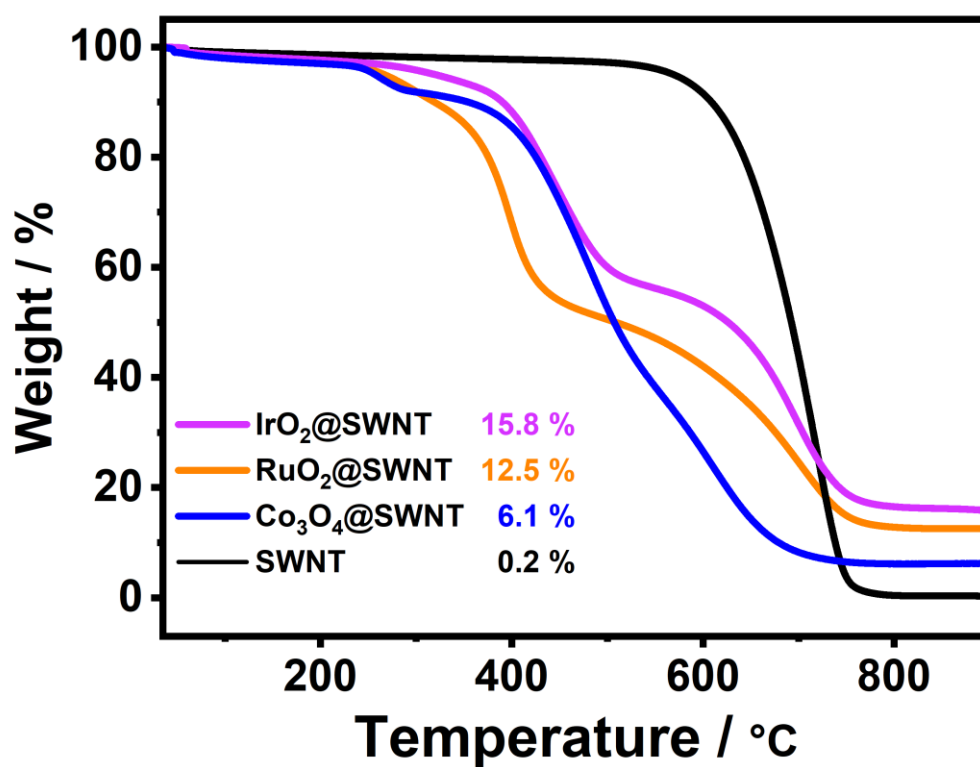

Figure S1 | Thermogravimetric analysis (TGA) traces of all catalysts. The final weight loadings are given as a weight %.

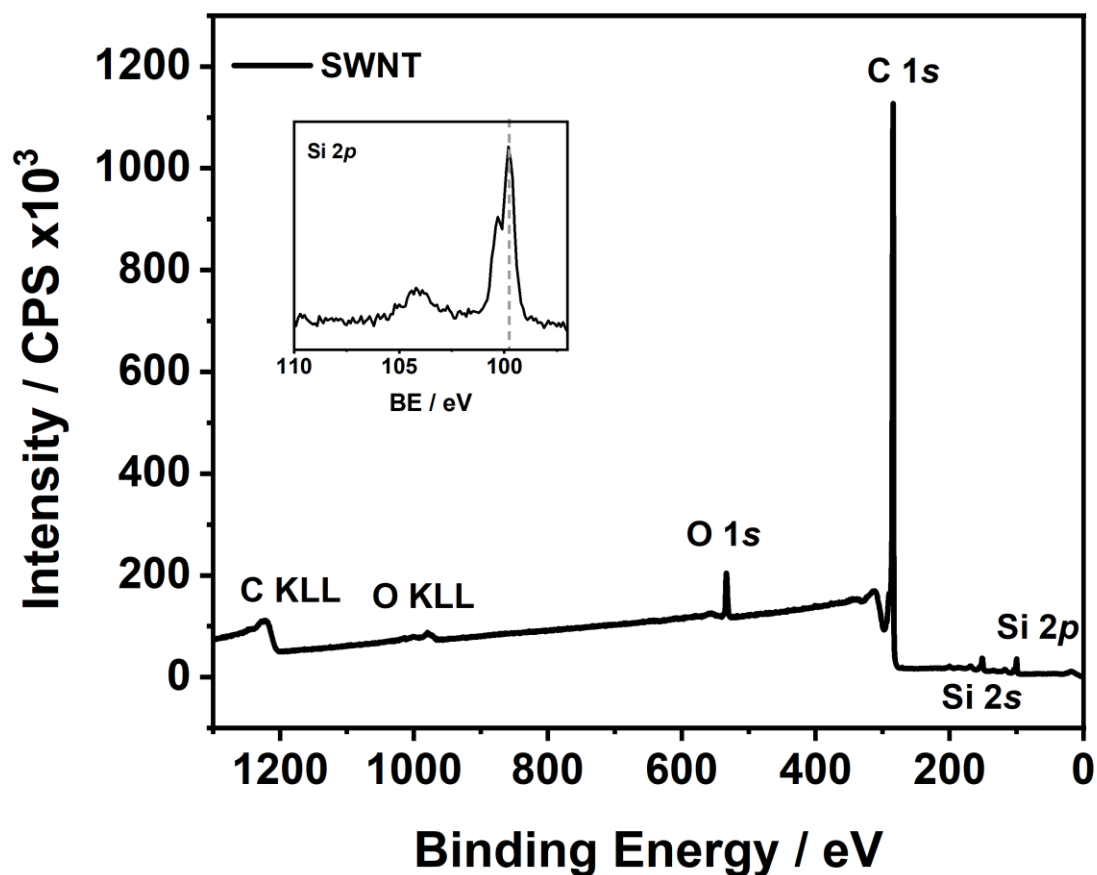

**Figure S2 | XPS spectrum of opened and washed SWNTs.** All XP spectra shown have been reference to the silicon 2p peak, shown in inset (discussed in supplementary note X). A very small feature at 200 eV is due to a small amount of chlorine left over from HCl washing procedure.

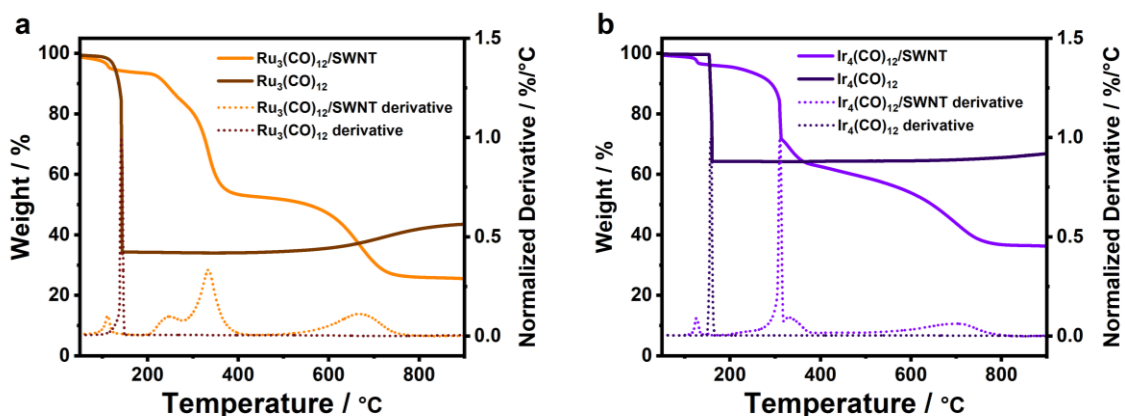

**Figure S3 | Thermogravimetric analysis (TGA) traces of a)  $\text{Ru}_3(\text{CO})_{12}$  and  $\text{Ru}_3(\text{CO})_{12}/\text{SWNT}$  and b)  $\text{Ir}_4(\text{CO})_{12}$  and  $\text{Ir}_4(\text{CO})_{12}/\text{SWNT}$ .** The derivative of each TGA trace is represented by dotted lines. The steep feature between 100 and 200 °C is due to carbonyl decomposition resulting in formation of metal oxide.

**Table S1 | Mass loadings, taken from TGA (Fig. S1), and defect densities taken from 532 nm Raman spectra, of the encapsulated materials and SWNT control before and after 2000 OER cycles.** The defect density of each material is calculated using the integrated Raman D/G ratios.<sup>11</sup> Atomic percent is calculated using mass loading taken from TGA.

| Catalyst                             | Mass loading<br>MO <sub>x</sub> /<br>wt. % | Atomic<br>percent of<br>M / % | Defect<br>density /<br>μm <sup>-1</sup> | 2000 cycle<br>defect<br>density /<br>μm <sup>-1</sup> |
|--------------------------------------|--------------------------------------------|-------------------------------|-----------------------------------------|-------------------------------------------------------|
| IrO <sub>2</sub> @SWNT               | 15.8                                       | 0.99                          | 8.4 ± 0.2                               | 11.8 ± 0.3                                            |
| RuO <sub>2</sub> @SWNT               | 12.5                                       | 1.27                          | 7.5 ± 0.2                               | 10.8 ± 0.3                                            |
| Co <sub>3</sub> O <sub>4</sub> @SWNT | 6.1                                        | 0.96                          | 11.2 ± 0.3                              | 19.3 ± 0.5                                            |
| SWNT                                 | N/A                                        | N/A                           | 5.0 ± 0.1                               | 14.3 ± 0.4                                            |

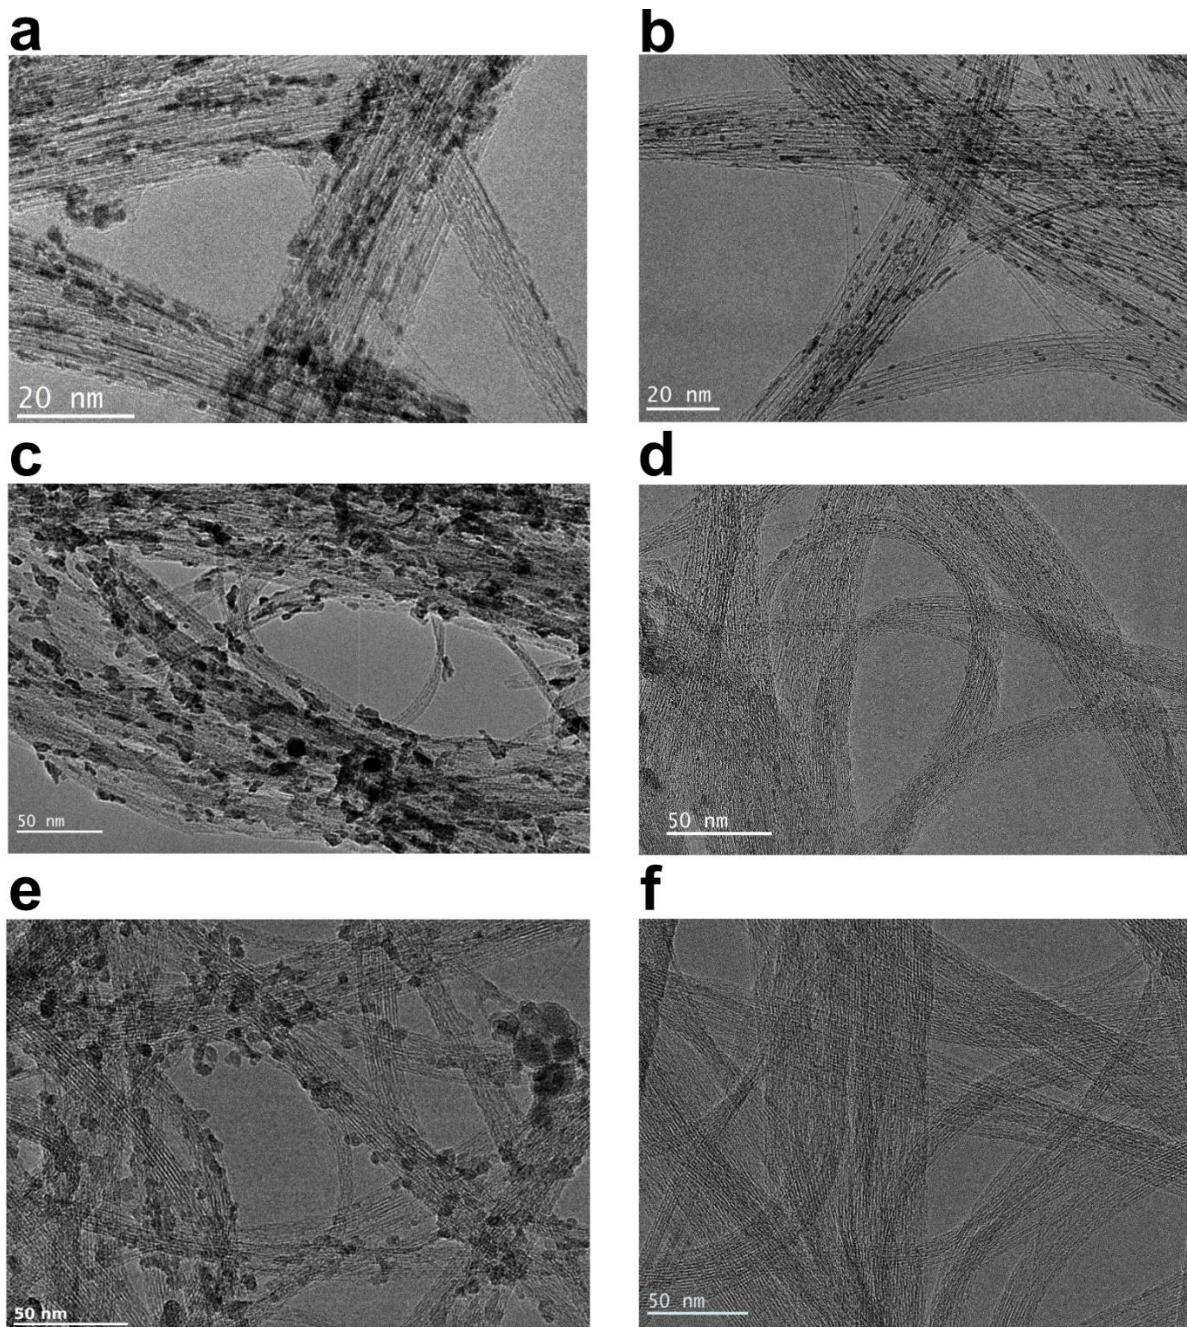

**Figure S4 | TEM images of metal oxide and SWNT catalysts before and after washing. a) IrO<sub>2</sub>/SWNT, b) IrO<sub>2</sub>@SWNT, c) RuO<sub>2</sub>/SWNT, d) RuO<sub>2</sub>@SWNT, e) Co<sub>3</sub>O<sub>4</sub>/SWNT and f) Co<sub>3</sub>O<sub>4</sub>@SWNT. The surface nanoparticles present in images a, c and e (areas of darker contrast) are removed after washing, as seen in images b, d and f. All images were taken with a JOEL 2100F TEM field emission gun microscope operating at an accelerating voltage of 200 kV.**



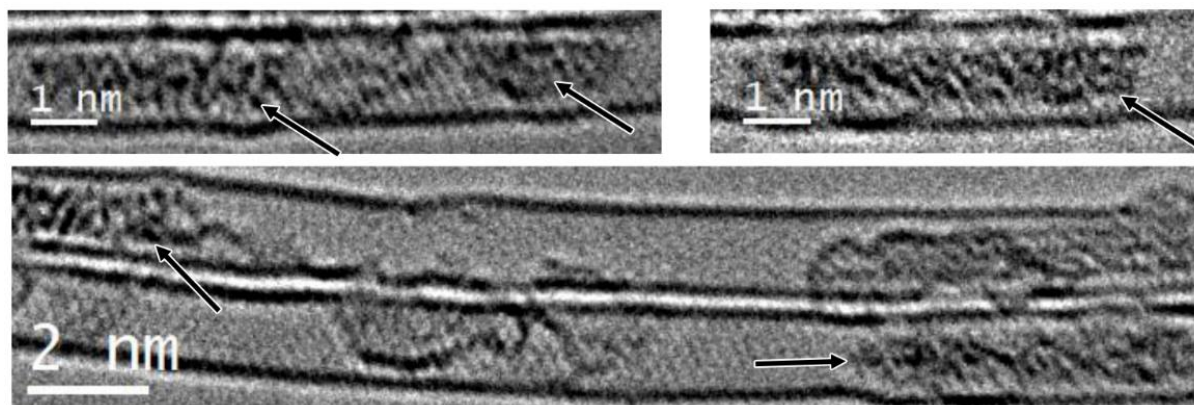

**Figure S5 | AC-HRTEM images of  $\text{Co}_3\text{O}_4@\text{SWNT}$ .** Arrows indicate encapsulated  $\text{Co}_3\text{O}_4$  nanoparticles. AC-TEM images were acquired using the dedicated low voltage spherical ( $C_s$ ) and chromatic ( $C_c$ ) aberration corrected SALVE TEM microscope operated at 60 kV.

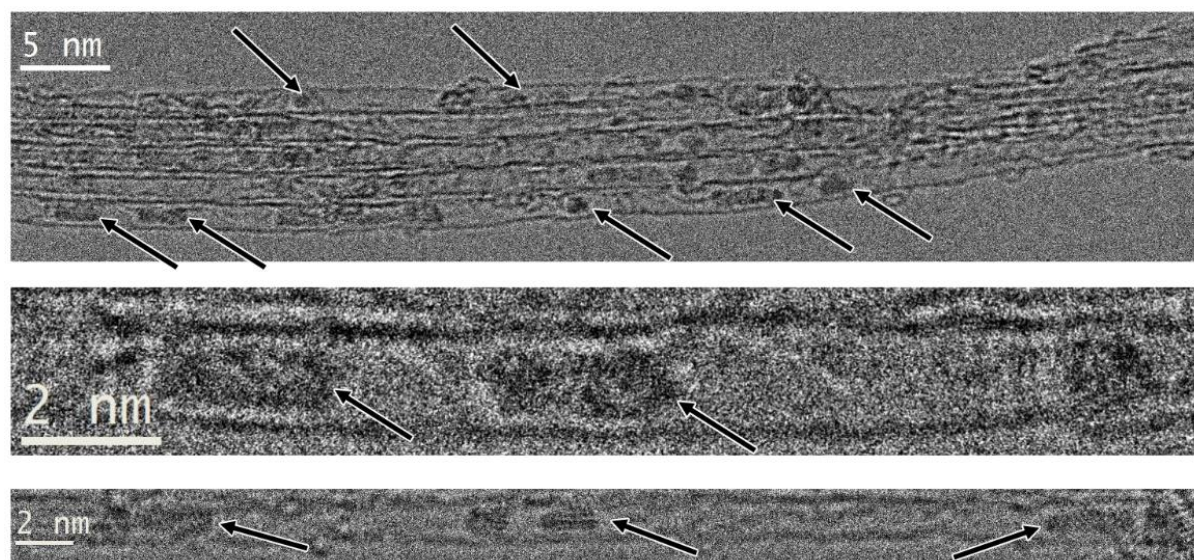

**Figure S6 | HRTEM images of  $\text{RuO}_2@\text{SWNT}$ .** Arrows indicate encapsulated  $\text{RuO}_2$  nanoparticles. HR-TEM images were acquired using a JOEL 2100F TEM field emission gun microscope operated at 200 kV.



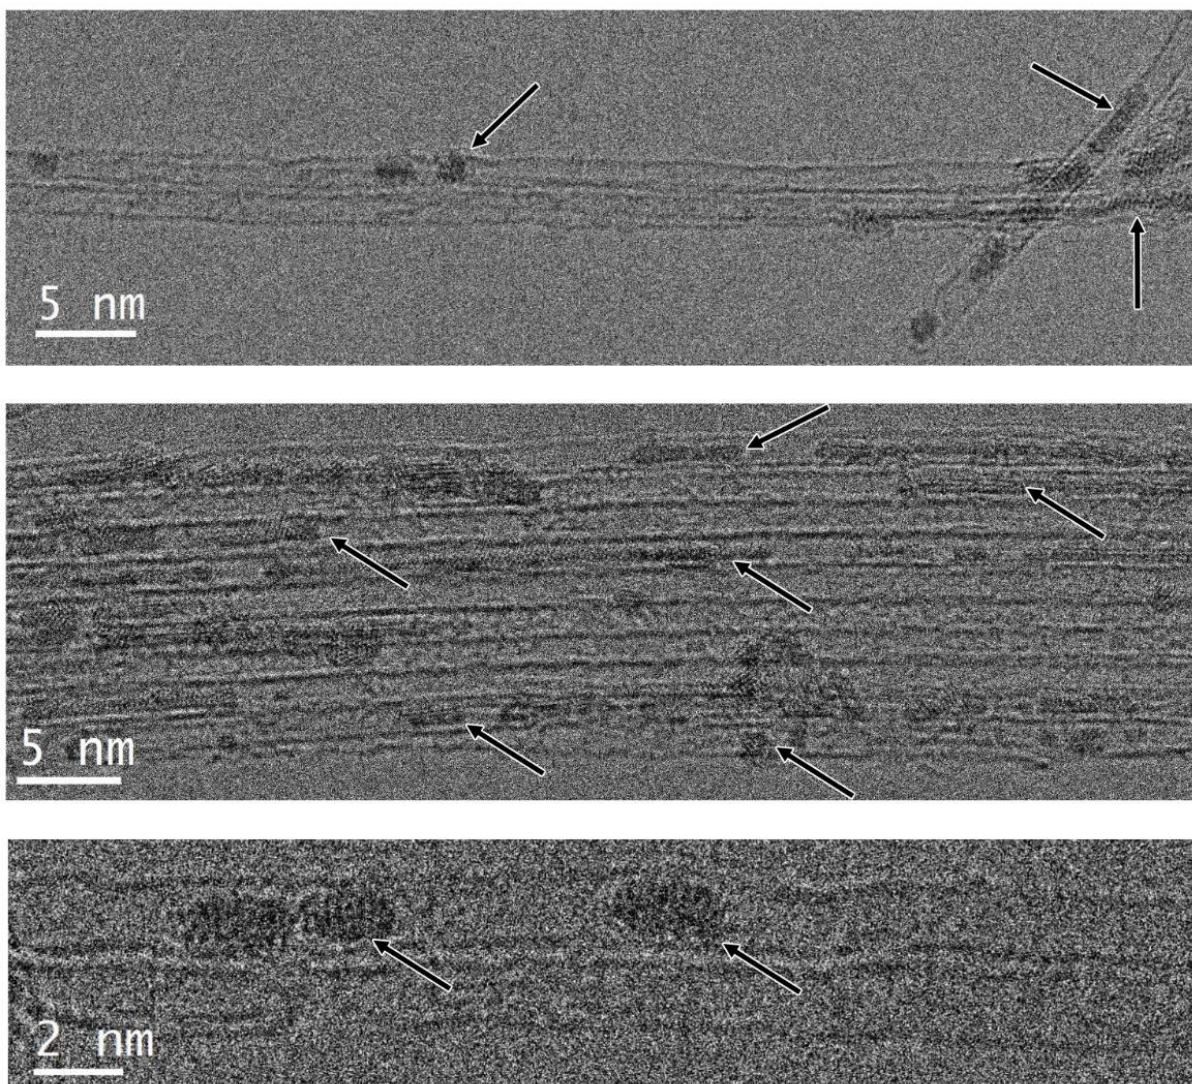

**Figure S7 | HRTEM images of IrO<sub>2</sub>@SWNT.** Arrows indicate encapsulated IrO<sub>2</sub> nanoparticles. HR-TEM images were acquired using a JOEL 2100F TEM field emission gun microscope operated at 200 kV.

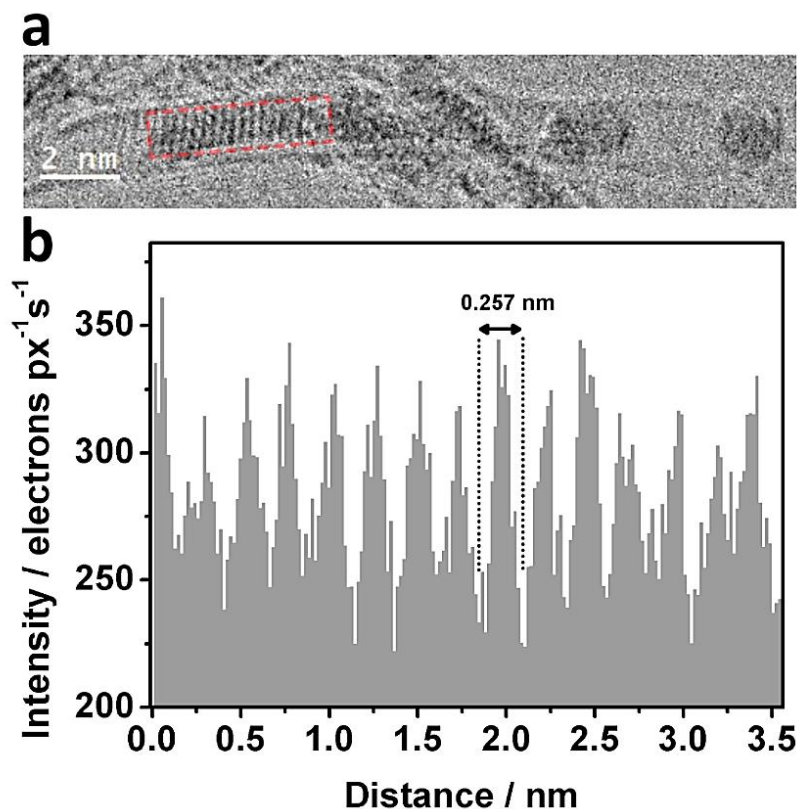

**Figure S8 | d-spacing of encapsulated IrO<sub>2</sub>@SWNT.** a) HRTEM image of IrO<sub>2</sub>@SWNT showing encapsulated IrO<sub>2</sub> (the same area is shown on the right-hand side of the top panel in Fig. S7). b) corresponding line profile of the contrast of the TEM image, taken from the highlighted area moving from left to right as shown in the image. Areas of low intensity indicate areas of high contrast, due to scattering of the electrons by the sample. A regular d-spacing of  $0.257 \pm 0.018$  nm is apparent for the encapsulated IrO<sub>2</sub>.

#### Supplementary note 1

For Co<sub>3</sub>O<sub>4</sub>@SWNT and RuO<sub>2</sub>@SWNT, the crystal structure of the encapsulated species could not be determined from the TEM images under these imaging conditions due to electron beam-induced dynamics, a common phenomenon when analyzing metal oxides by TEM.<sup>12,13</sup> In the case of IrO<sub>2</sub>@SWNT. However, the encapsulated IrO<sub>2</sub> was stable enough under the electron beam for d-spacing of  $0.257 \pm 0.018$  nm to be seen (Fig. S8). Using Bragg's law, a d-spacing value of 0.257 nm gives a  $2\theta$  value of 34.8 degrees, which matches well with the (101) plane of rutile-type IrO<sub>2</sub>.<sup>14,15</sup>



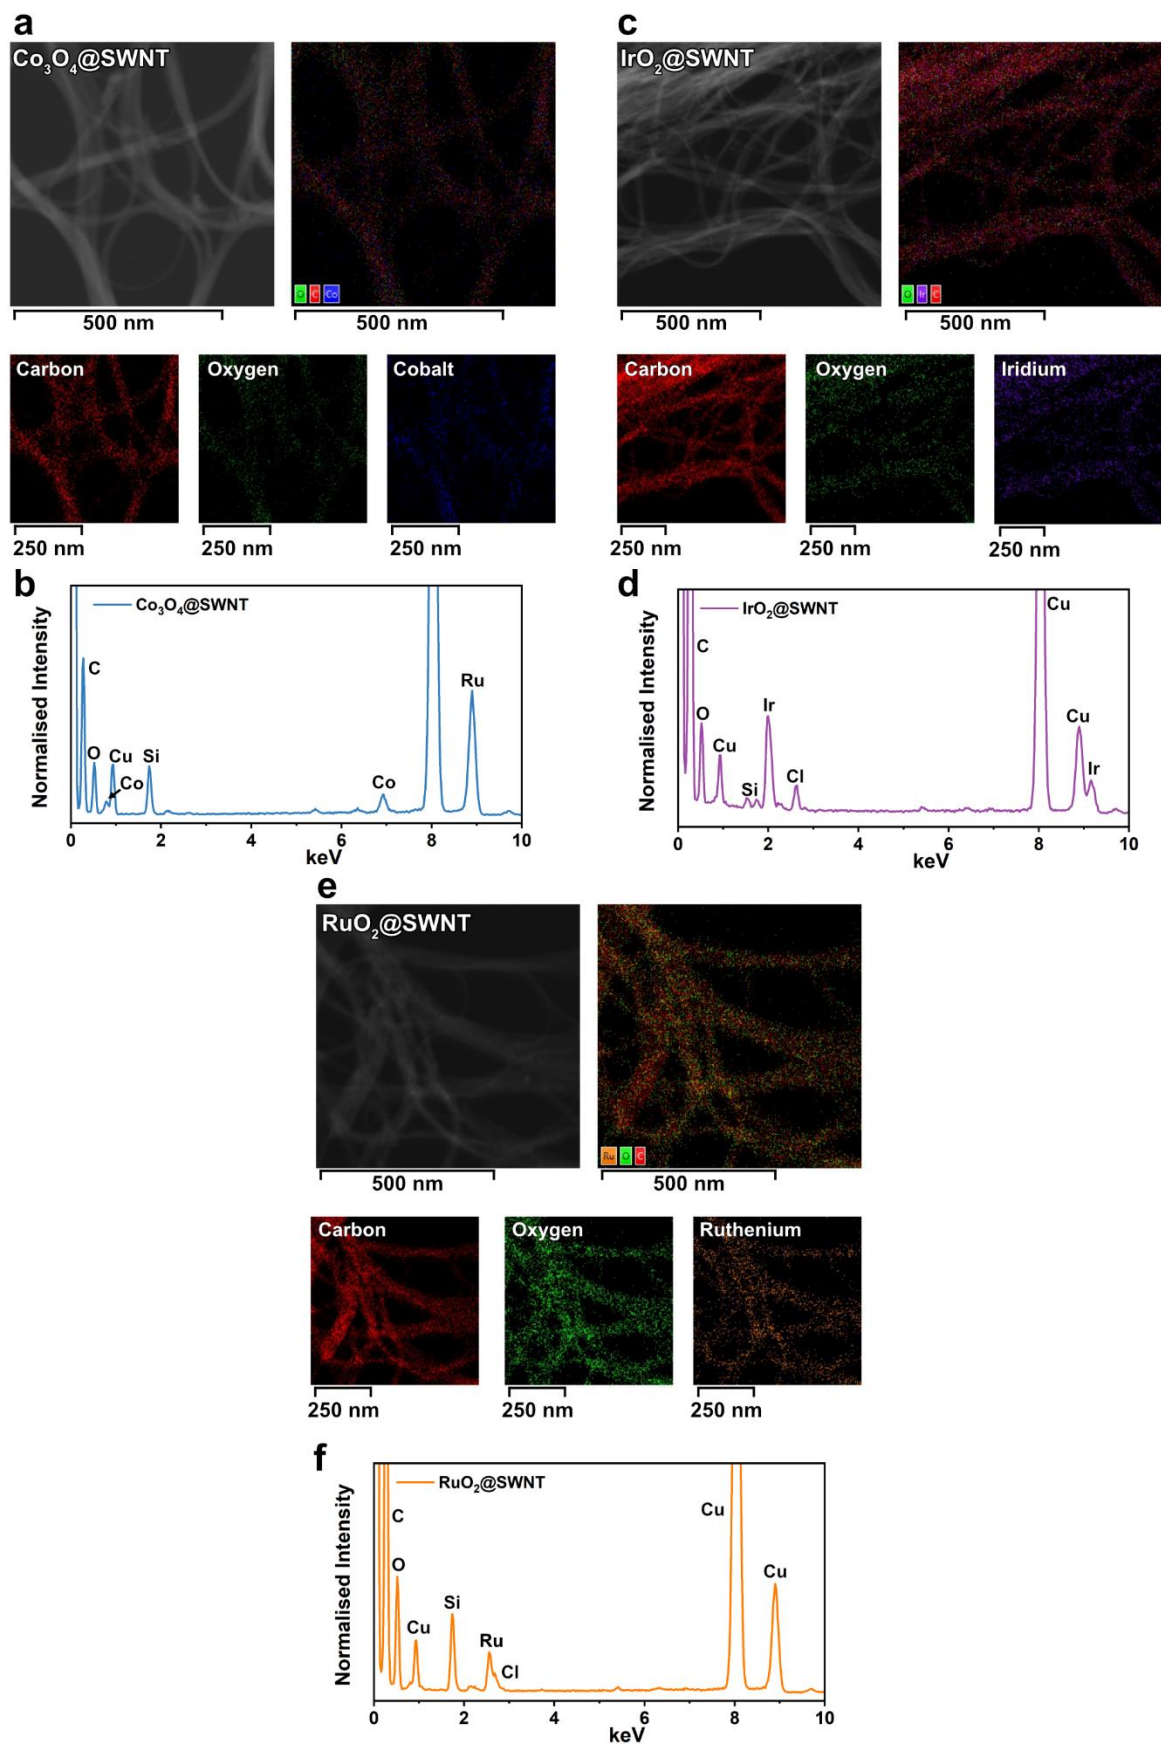

**Figure S9 | Scanning transmission electron microscopy (STEM) energy dispersive X-ray (EDX) maps and corresponding spectra of  $\text{Co}_3\text{O}_4@\text{SWNT}$ ,  $\text{IrO}_2@\text{SWNT}$  and  $\text{RuO}_2@\text{SWNT}$ . Small peaks at 2.1, 5.4 and 6.4 eV are due to gold, chromium and iron arising from the sample holder.**



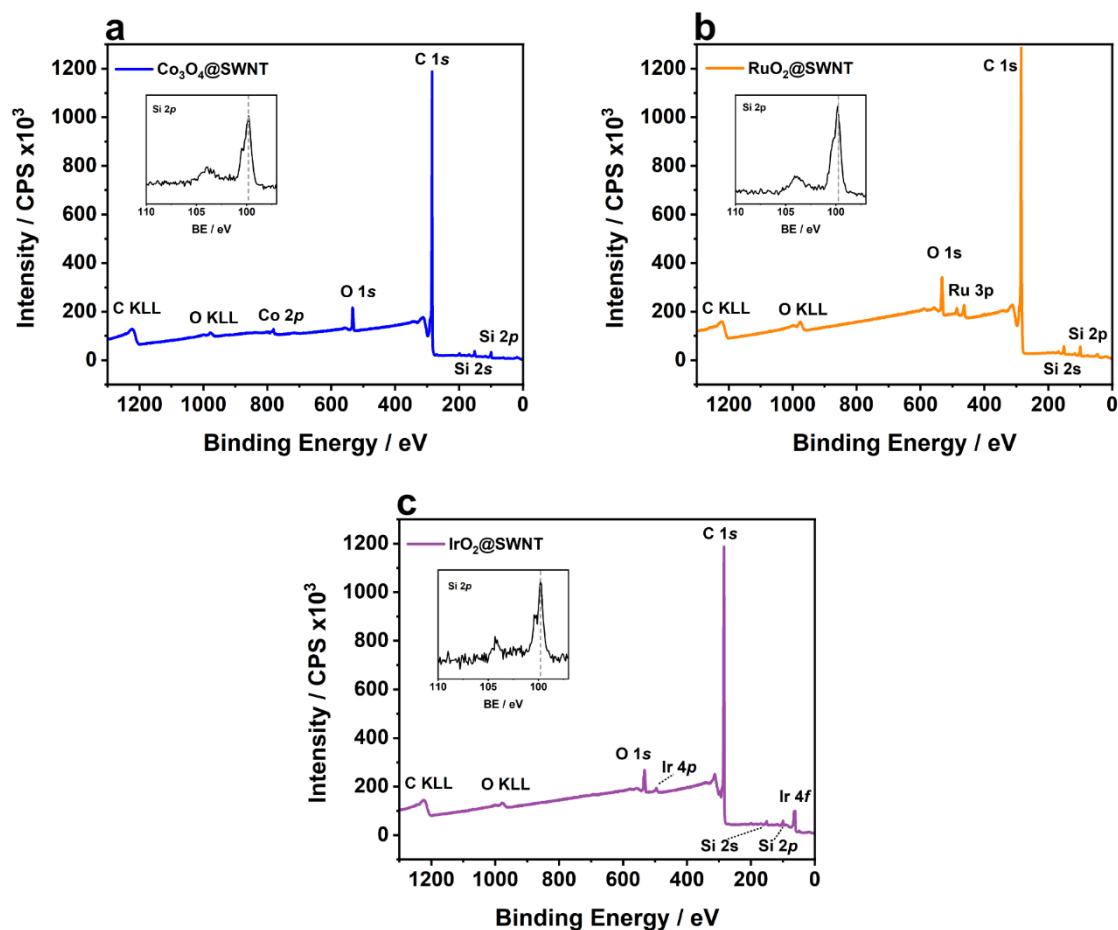

**Figure S10 | XPS spectra of a)  $\text{Co}_3\text{O}_4$ @SWNT, b)  $\text{RuO}_2$ @SWNT and c)  $\text{IrO}_2$ @SWNT.** Inset is the high-resolution Si 2p region taken from each sample, originating from the Si wafer support, which is used here as an internal reference for charge correction.

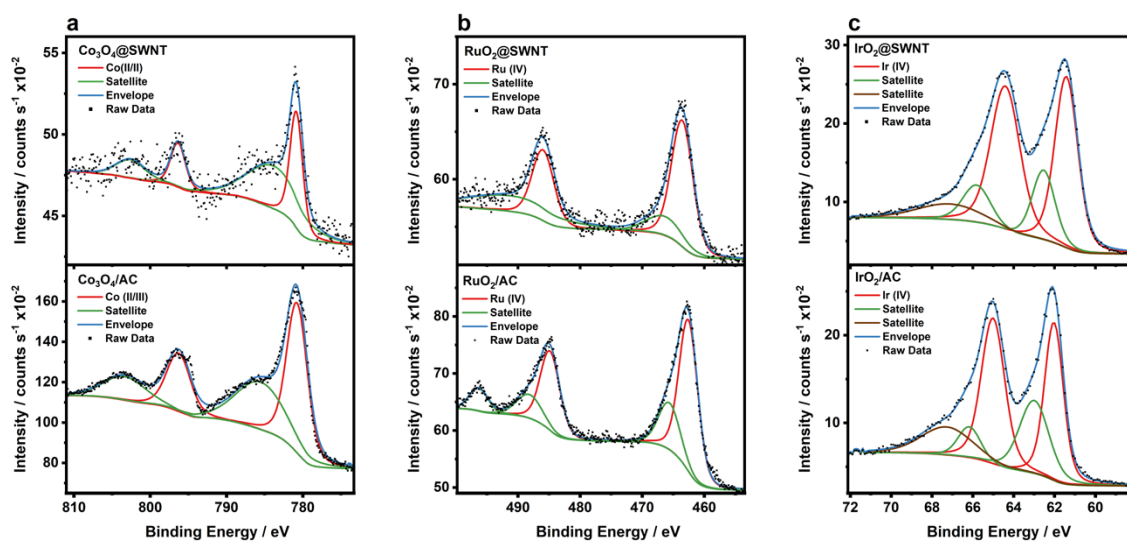

**Figure S11 | XPS spectra of a) Co 2p region of  $\text{Co}_3\text{O}_4$ @SWNT (top) and  $\text{Co}_3\text{O}_4$ /AC (bottom), b) Ru 3p region of  $\text{RuO}_2$ @SWNT (top) and  $\text{RuO}_2$ /AC (bottom) and c) Ir 4f region of  $\text{IrO}_2$ @SWNT (top) and  $\text{IrO}_2$ /AC (bottom).**

## Supplementary note 2

X-ray photoelectron spectroscopy (XPS) analysis of the  $\text{MO}_x\text{@SWNT}$  materials (Fig. S11) was performed to elucidate the state of confined  $\text{MO}_x$ . In  $\text{Co}_3\text{O}_4\text{@SWNT}$ , Co  $2p_{1/2}$  and  $2p_{3/2}$  peaks are seen at 796.4 eV and 781.0 eV, respectively, matching with literature values for  $\text{Co}_3\text{O}_4$ .<sup>16,17</sup> We note that the precise assignment of cobalt oxide species can be difficult with XPS due to overlapping peaks in the Co 2p peak, and it is possible this cobalt oxide species could be  $\text{CoO}_2$  or  $\text{CoO}$ .<sup>18</sup> Two distinct peaks are seen within the  $2p_{3/2}$  region at 780.1 eV and 781.7 eV, corresponding to  $\text{Co}^{3+}$  and  $\text{Co}^{2+}$ , respectively. The same is seen in the  $2p_{1/2}$  region with peaks at 795.5 eV and 797.1.0 eV, corresponding to  $\text{Co}^{3+}$  and  $\text{Co}^{2+}$ , respectively.<sup>19,20</sup> Ru  $3p_{3/2}$  and  $3p_{1/2}$  values of 463.3 and 485.8 eV were seen, once again matching well to literature values for  $\text{RuO}_2$ .  $\text{IrO}_2\text{@SWNT}$  had Ir  $4f_{7/2}$  and Ir  $4f_{5/2}$  values of 61.4 and 64.4 eV respectively, matching well to literature values for  $\text{IrO}_2$ , corroborating the elucidation of  $\text{IrO}_2$  by TEM analysis (supplementary note 1).<sup>21</sup> Direct comparison of the metal peaks between  $\text{MO}_x\text{@SWNT}$  and  $\text{MO}_x\text{/AC}$  materials is difficult with both charge transfer from the carbon and changes in metal oxide morphology affecting the shape and position of the peaks. Metal peaks in the  $\text{MO}_x\text{/AC}$  materials are observed at similar positions as  $\text{MO}_x\text{@SWNT}$  (Figure S11), indicating the presence of  $\text{Co}_3\text{O}_4$ ,  $\text{RuO}_2$  and  $\text{IrO}_2$ . In the case of  $\text{IrO}_2\text{/AC}$ , a shift to higher binding energies as compared to  $\text{IrO}_2\text{@SWNT}$  is observed, which may be due to charge transfer from the SWNT to the encapsulated  $\text{IrO}_2$ .

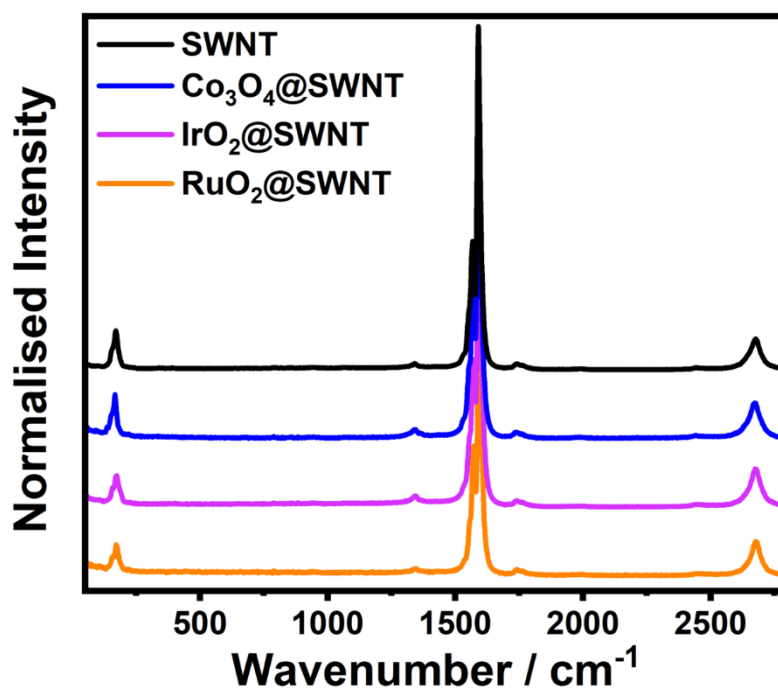

**Figure S12 | 532 nm resonance Raman spectra of SWNTs,  $\text{Co}_3\text{O}_4\text{@SWNT}$ ,  $\text{IrO}_2\text{@SWNT}$  and  $\text{RuO}_2\text{@SWNT}$ , showing the RBM, D and G bands of semiconducting SWNT at  $\sim 170\text{ cm}^{-1}$ ,  $1330\text{ cm}^{-1}$  and  $1600\text{ cm}^{-1}$ , respectively.**

**Table S2 | Electrochemical performance of the MO<sub>x</sub>@SWNT catalysts.** The overpotential required to reach 10 mA cm<sup>-2</sup>,  $\eta_{10}$ , and Tafel slopes are taken from LSVs performed in N<sub>2</sub> saturated 0.1 M potassium hydroxide using a scan rate of 5 mV/s for each catalyst (Fig. 2a) before and after electrochemical cycling between 0.9 and 1.7 V using a scan rate of 100 mV/s for 2000 cycles in N<sub>2</sub> saturated 0.1 M potassium hydroxide.

| Catalyst                             | Change in $\eta_{10}$ after 2000 cycles / mV | Tafel slope / mV dec <sup>-1</sup> | Tafel slope after 2000 cycles / mV dec <sup>-1</sup> |
|--------------------------------------|----------------------------------------------|------------------------------------|------------------------------------------------------|
| Co <sub>3</sub> O <sub>4</sub> @SWNT | 14                                           | 100                                | 83                                                   |
| RuO <sub>2</sub> @SWNT               | 3                                            | 192                                | 67                                                   |
| IrO <sub>2</sub> @SWNT               | -25                                          | 89                                 | 77                                                   |
| SWNT                                 | N/A                                          | 108                                | 159                                                  |

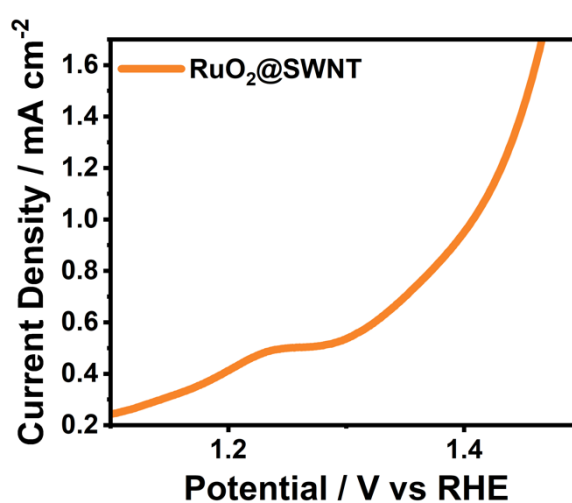

**Figure S13 | LSV of RuO<sub>2</sub>@SWNT in O<sub>2</sub> saturated 0.1M potassium hydroxide, showing RuO<sub>2</sub> oxidation at 1.24 V vs RHE.**



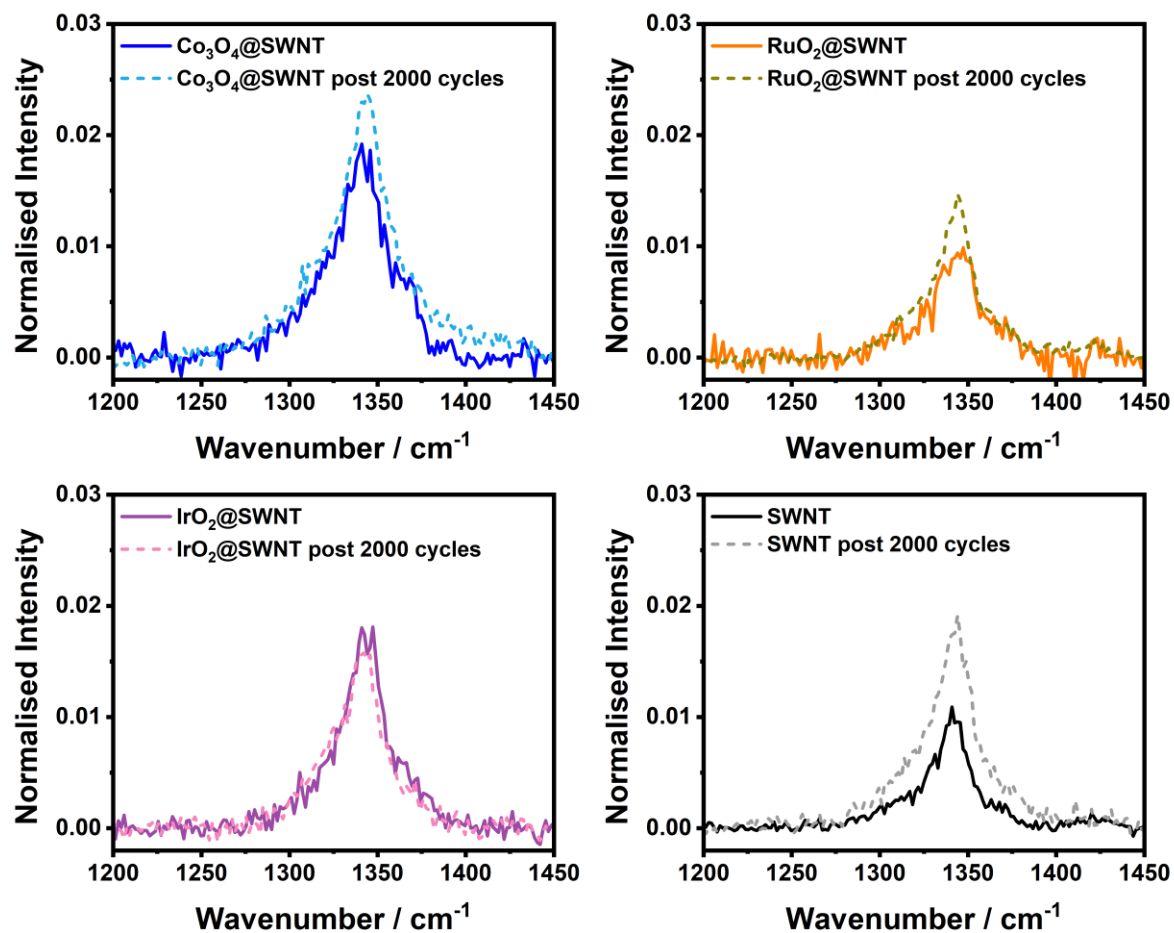

Figure S14 | (a-d) Raman spectra of Co<sub>3</sub>O<sub>4</sub>@SWNT, RuO<sub>2</sub>@SWNT, IrO<sub>2</sub>@SWNT and SWNT respectively, before and after cycling 2000 times in 0.1 M KOH. Spectra highlight the D band, with intensities normalised to the G band.

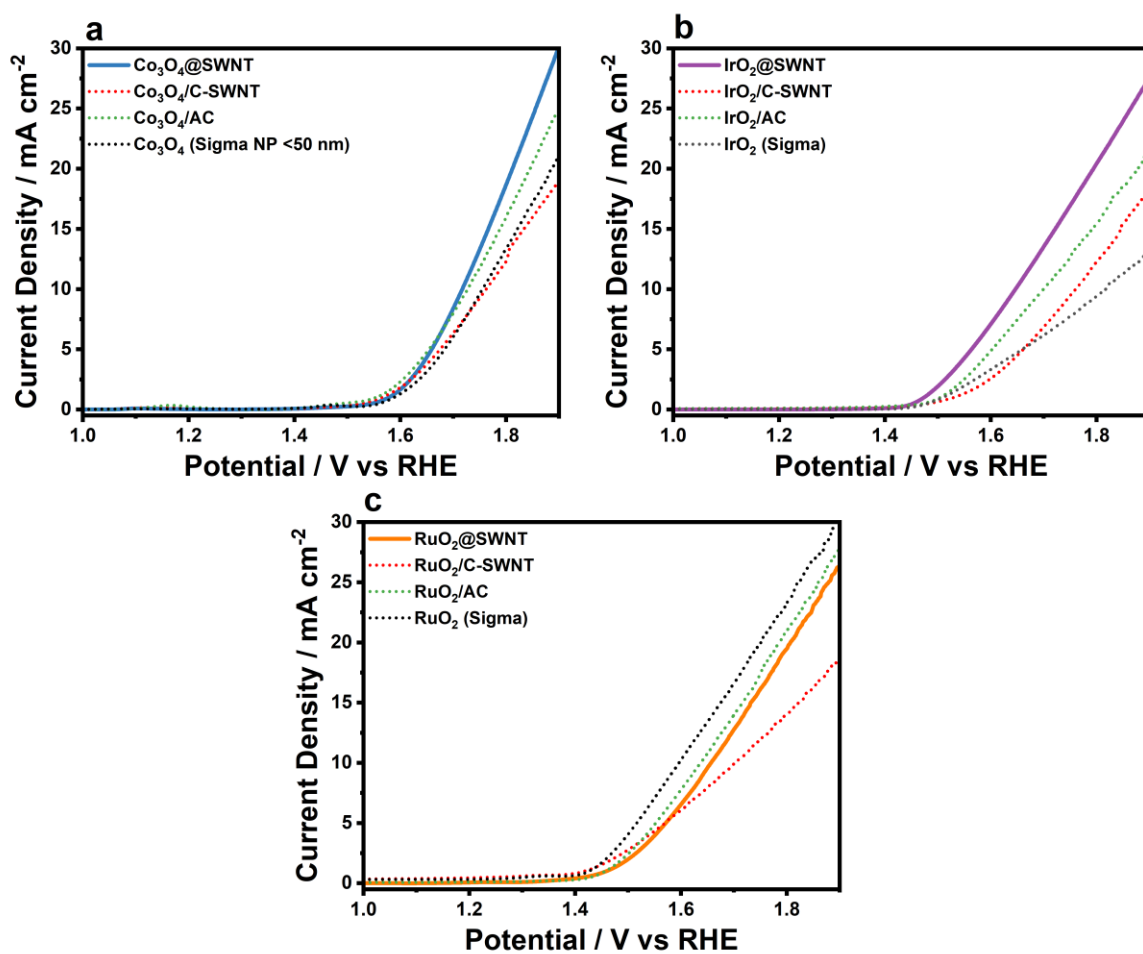

Figure S15 | a-c) LSVs of  $\text{Co}_3\text{O}_4$ @SWNT,  $\text{IrO}_2$ @SWNT and  $\text{RuO}_2$ @SWNT respectively, compared to relevant  $\text{MO}_x/\text{C-SWNT}$ ,  $\text{MO}_x/\text{AC}$  and commercially available  $\text{MO}_x$  in  $\text{O}_2$  saturated 0.1 M potassium hydroxide.

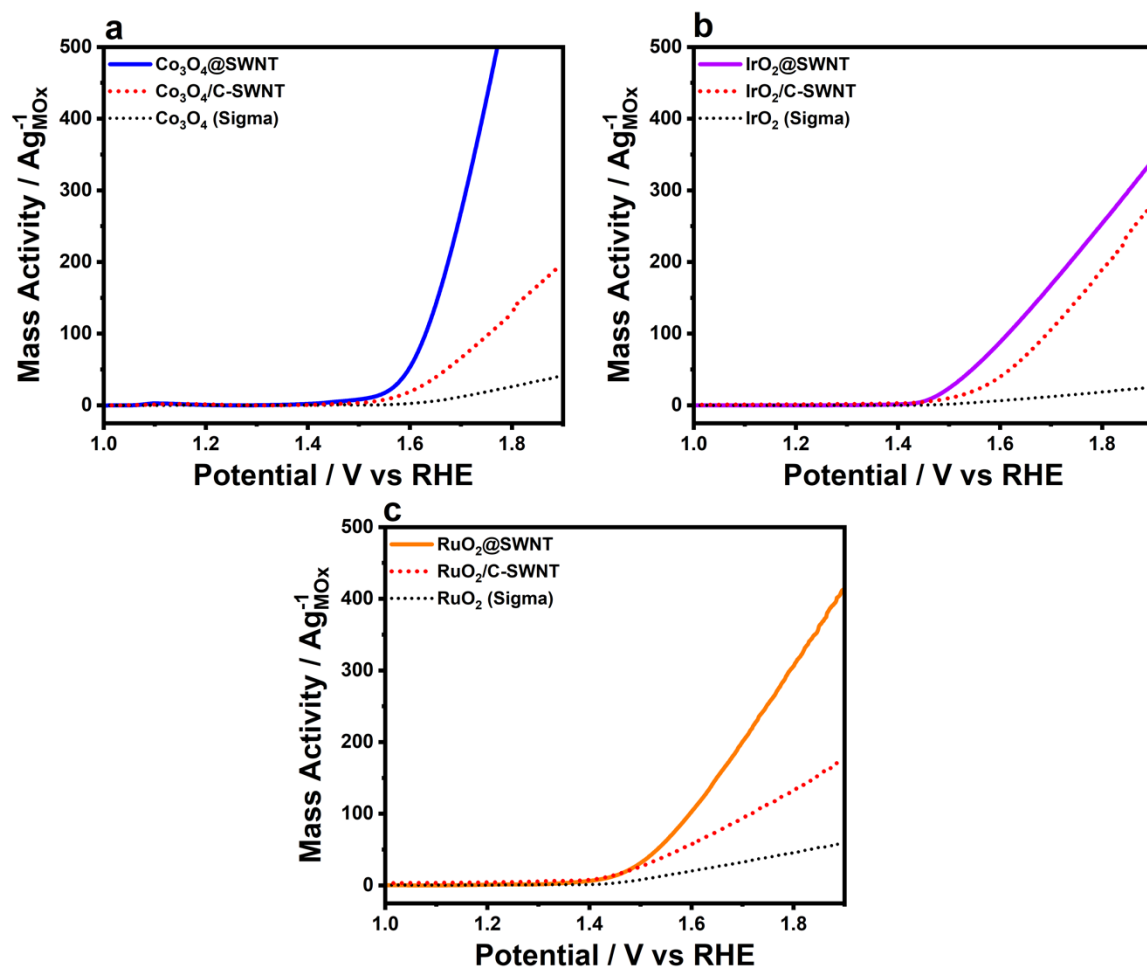

Figure S16 | a-c) LSVs presented as mass activities of  $\text{Co}_3\text{O}_4$ @SWNT,  $\text{IrO}_2$ @SWNT and  $\text{RuO}_2$ @SWNT respectively, compared to relevant  $\text{MO}_x$ /C-SWNT, and commercially available  $\text{MO}_x$  in  $\text{O}_2$  saturated 0.1 M potassium hydroxide. Mass activity is calculated based on weight of  $\text{MO}_x$  drop-cast on the electrode using relevant TGA data (Fig. S1 and S17).



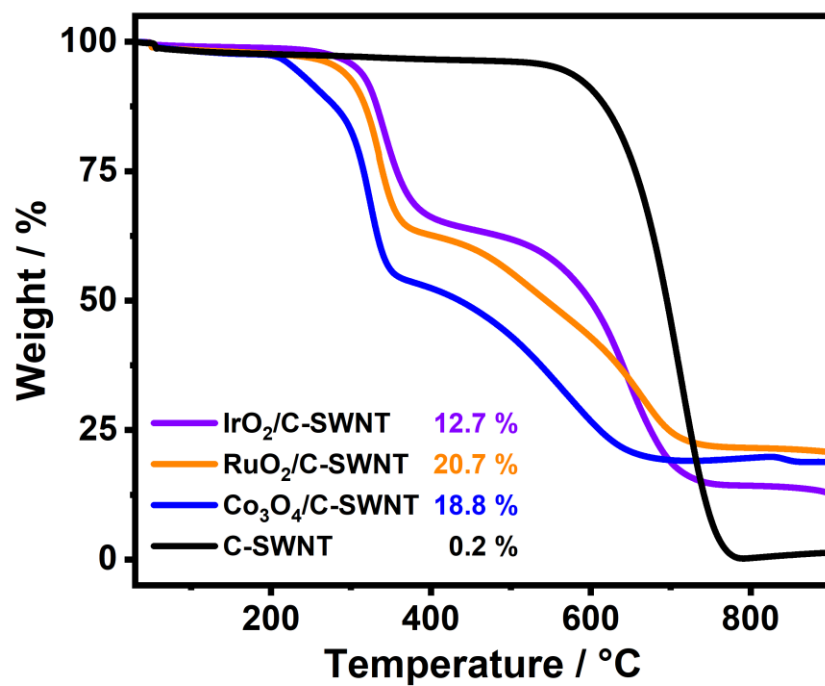

Figure S17 | Thermogravimetric analysis (TGA) traces of all MO<sub>x</sub>/C-SWNT materials. The final weight loadings are given as a weight %.

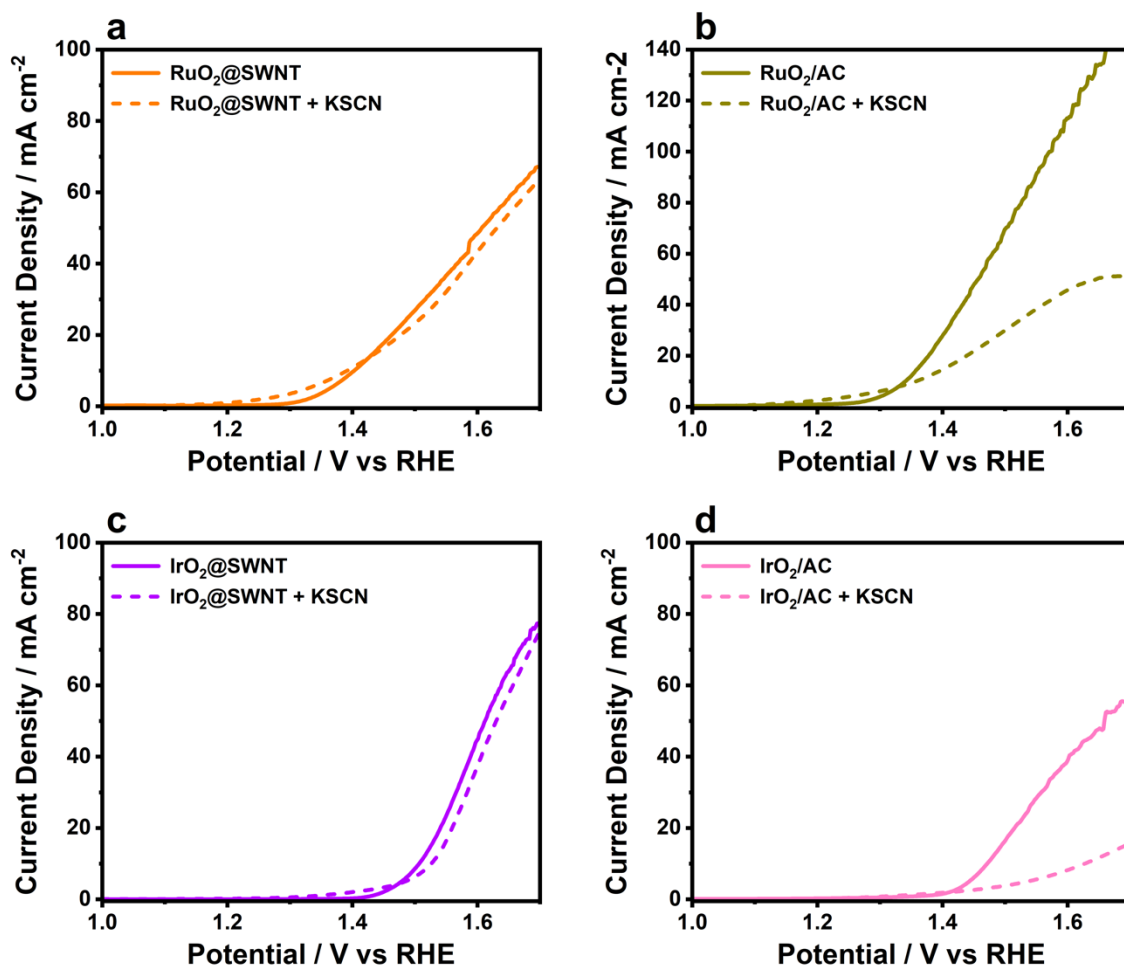

**Figure S18 | KSCN poisoning experiments of RuO<sub>2</sub>@SWNT, RuO<sub>2</sub>/AC, IrO<sub>2</sub>@SWNT and IrO<sub>2</sub>/AC (a-d) respectively.** LSVs were performed in 1.0 M KOH using a scan rate of 5 mV/s, before addition of 0.1 M KSCN. The modified working electrode was allowed to rotate in 1.0 M KOH and 0.1 M KSCN for 30 minutes before another LSV was performed.

**a**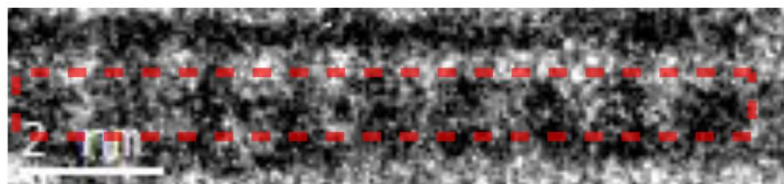**b**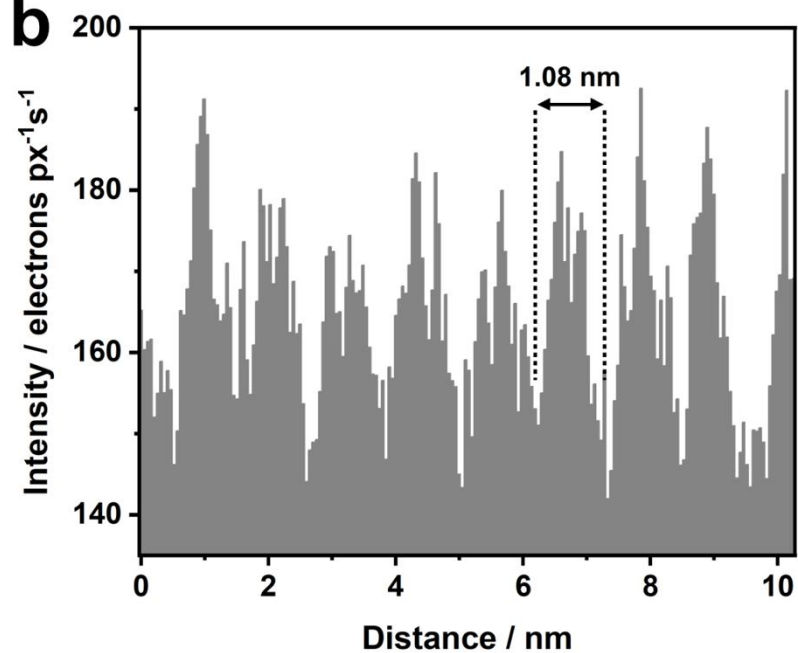

**Figure S19 | TEM analysis of (C<sub>60</sub>)-Co<sub>3</sub>O<sub>4</sub>@SWNT.** a) HRTEM image showing encapsulated C<sub>60</sub> at tube ends and b) Line profile (highlighted in image a) showing inter-C<sub>60</sub> distances of 1.08±0.05 nm, which match well to literature values for inter-C<sub>60</sub> distances in C<sub>60</sub>@SWNT.



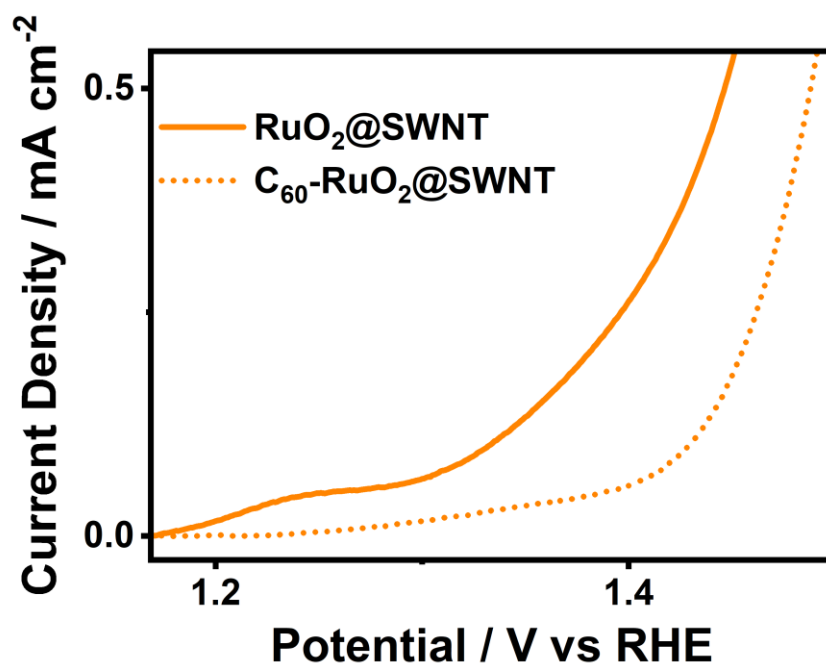

Figure S20 | LSV of RuO<sub>2</sub>@SWNT and C<sub>60</sub>-RuO<sub>2</sub>@SWNT in N<sub>2</sub> saturated 0.1M potassium hydroxide, showing the RuO<sub>2</sub> oxidation at 1.24 V vs RHE and the loss of oxidation process upon capping.

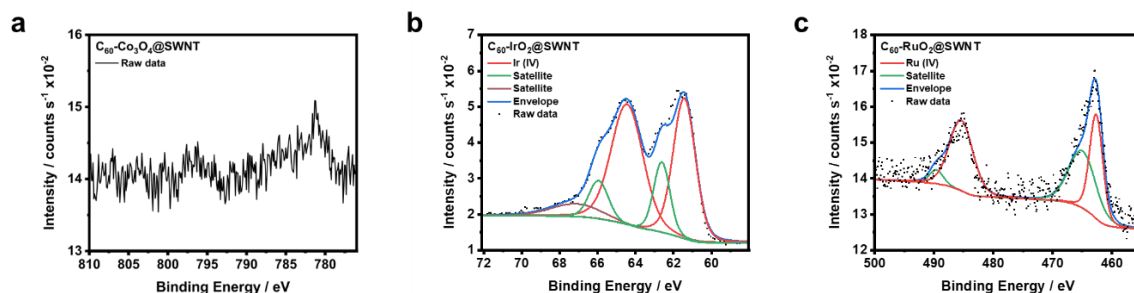

Figure S21 | XPS spectra of a) Co 2p region of Co<sub>3</sub>O<sub>4</sub>@SWNT b) 4f region of IrO<sub>2</sub>@SWNT and c) 3p region of RuO<sub>2</sub>@SWNT plugged with C<sub>60</sub> after polarisation of 0 to 1.6 V vs RHE in N<sub>2</sub> saturated 0.1 M KOH at 5 mV s<sup>-1</sup>.

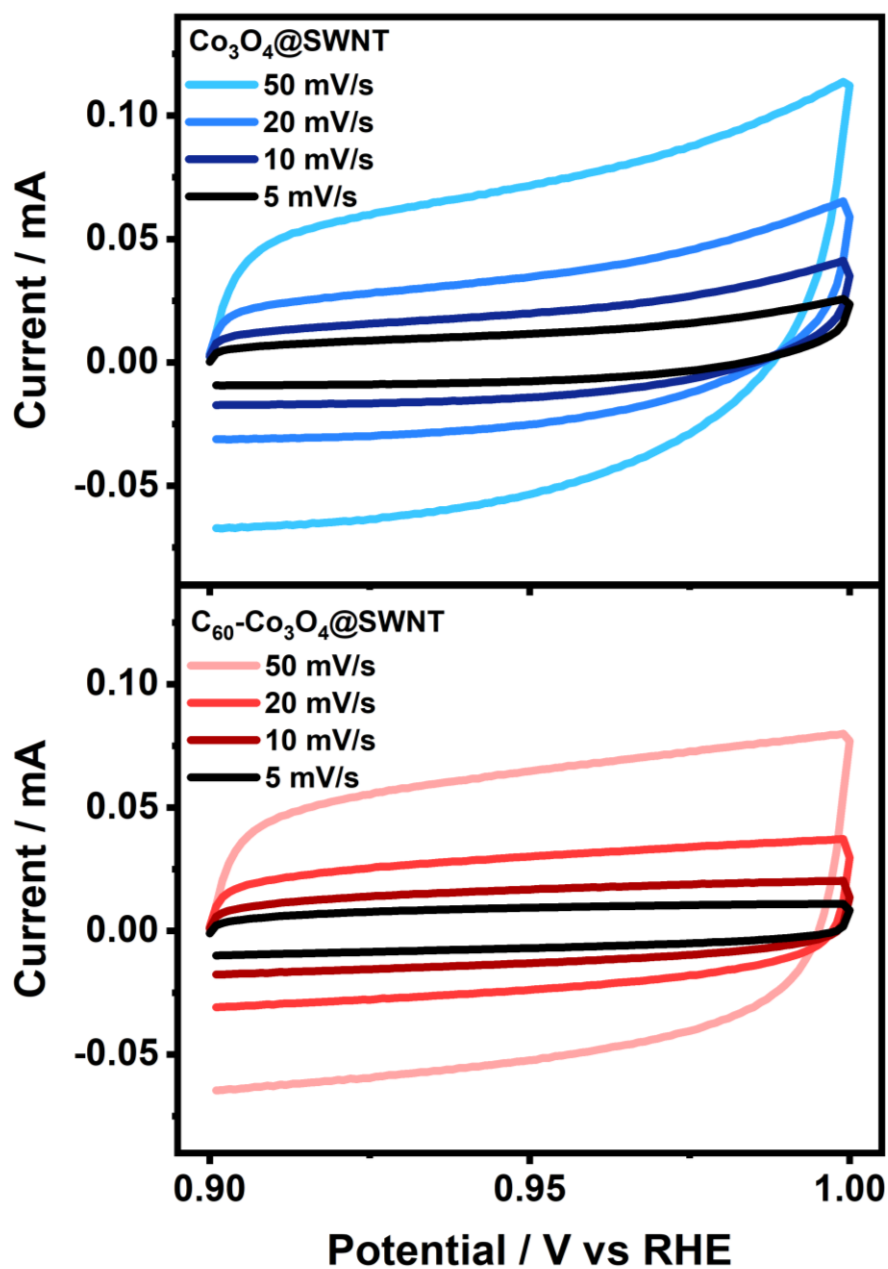

**Figure S22 |** Cyclic voltammograms of  $\text{Co}_3\text{O}_4@\text{SWNT}$  and  $\text{C}_{60}\text{-Co}_3\text{O}_4@\text{SWNT}$  in a non-faradaic region at different scan rates, recorded in  $\text{N}_2$  saturated 0.1 M potassium hydroxide. Current values were taken at 0.95 V vs RHE and the capacitance was calculated from the slope of a plot of scan rate against current to give a value of 1.16 mF and 1.10 mF for  $\text{Co}_3\text{O}_4@\text{SWNT}$  and  $\text{C}_{60}\text{-Co}_3\text{O}_4@\text{SWNT}$ , respectively.

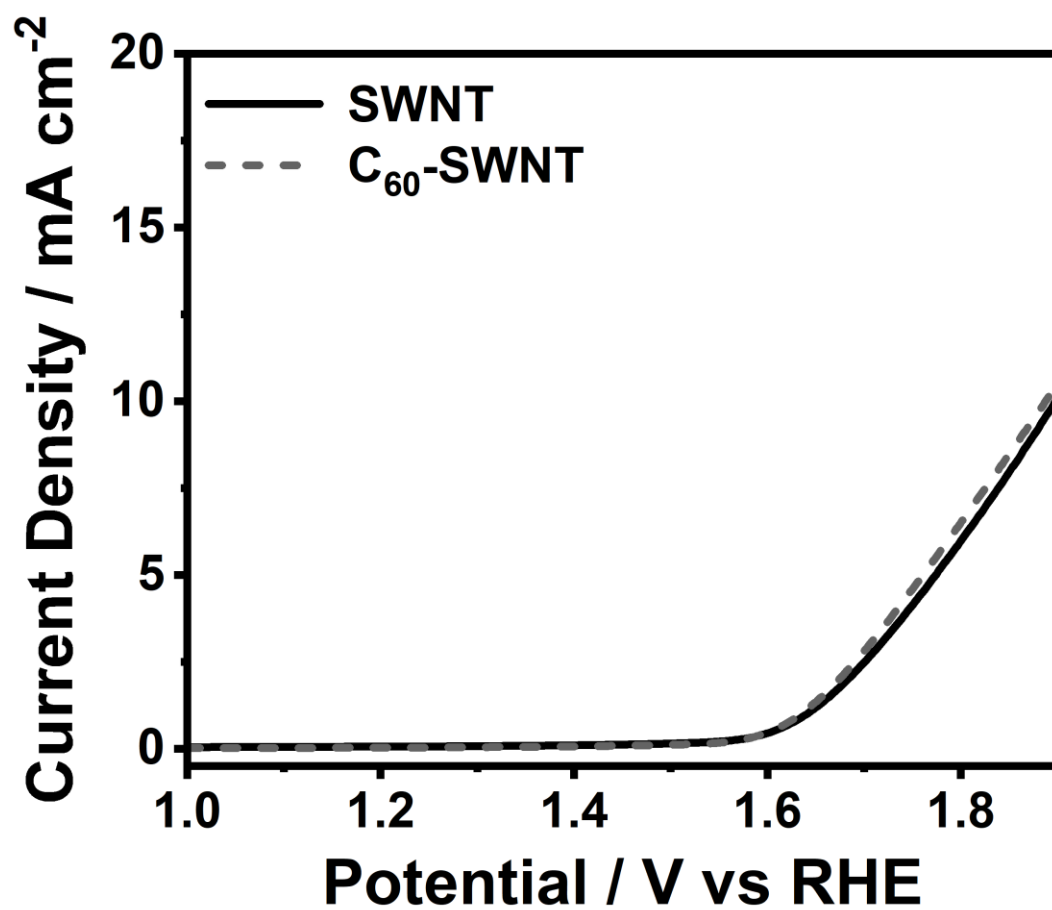

Figure S23 | RDE-LSVs of SWNT and C<sub>60</sub>-SWNT, recorded in N<sub>2</sub> saturated 0.1 M potassium hydroxide at 5 mV s<sup>-1</sup> and 1600 rpm.

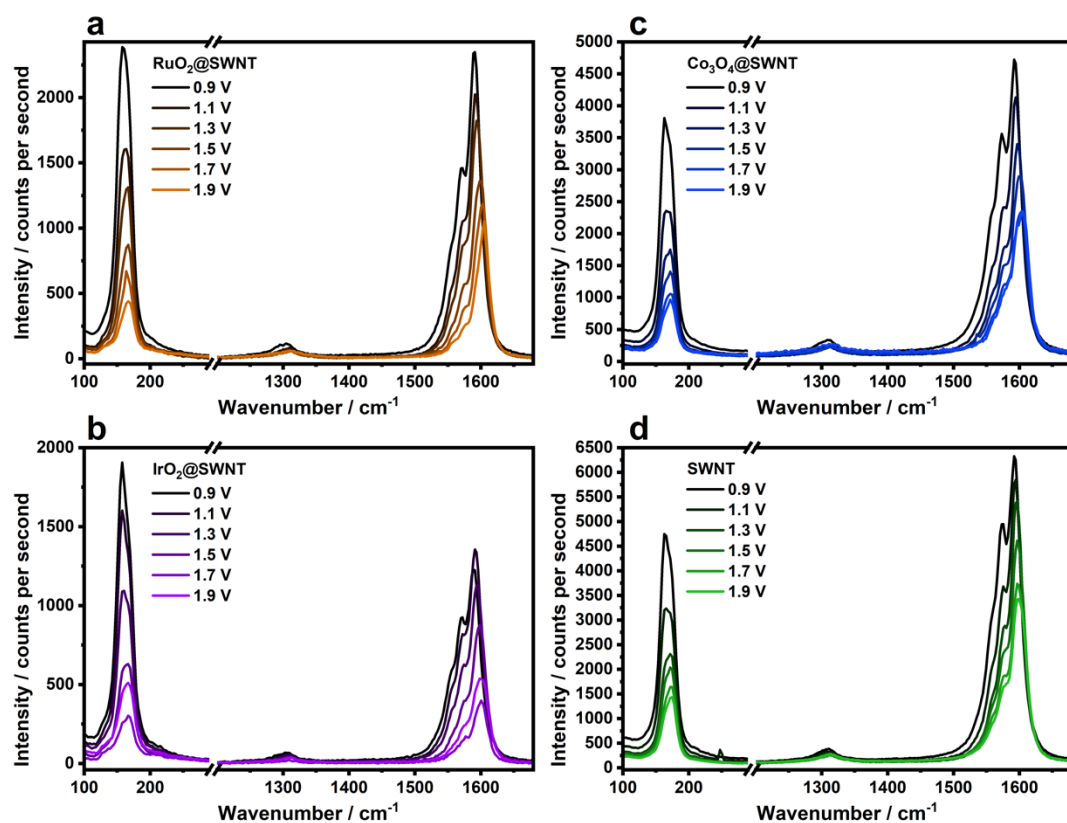

**Figure S24 | 785 nm Raman spectra of MO<sub>x</sub>@SWNT materials**, taken at potential holds from 0.9 to 1.9 V vs RHE in N<sub>2</sub> saturated 0.1 M potassium hydroxide. Each spectrum shown represents the average from 9 spectra collected from a 50x50 um regular array across the modified electrode surface.

**Table S3 | Changes in I<sub>D</sub>:I<sub>G</sub> and G band position for MO<sub>x</sub>@SWNT between 0.9 V and 1.9 V vs RHE in 0.1 M potassium hydroxide**, taken from in-situ electrochemical 785 nm Raman spectroscopy (Fig. S24).

|                                      | Increase in I <sub>D</sub> :I <sub>G</sub> / % | Blueshift in position of G band / cm <sup>-1</sup> |
|--------------------------------------|------------------------------------------------|----------------------------------------------------|
| Co <sub>3</sub> O <sub>4</sub> @SWNT | 28                                             | 12                                                 |
| RuO <sub>2</sub> @SWNT               | 2                                              | 14                                                 |
| IrO <sub>2</sub> @SWNT               | 28                                             | 9                                                  |
| SWNT                                 | 22                                             | 7                                                  |



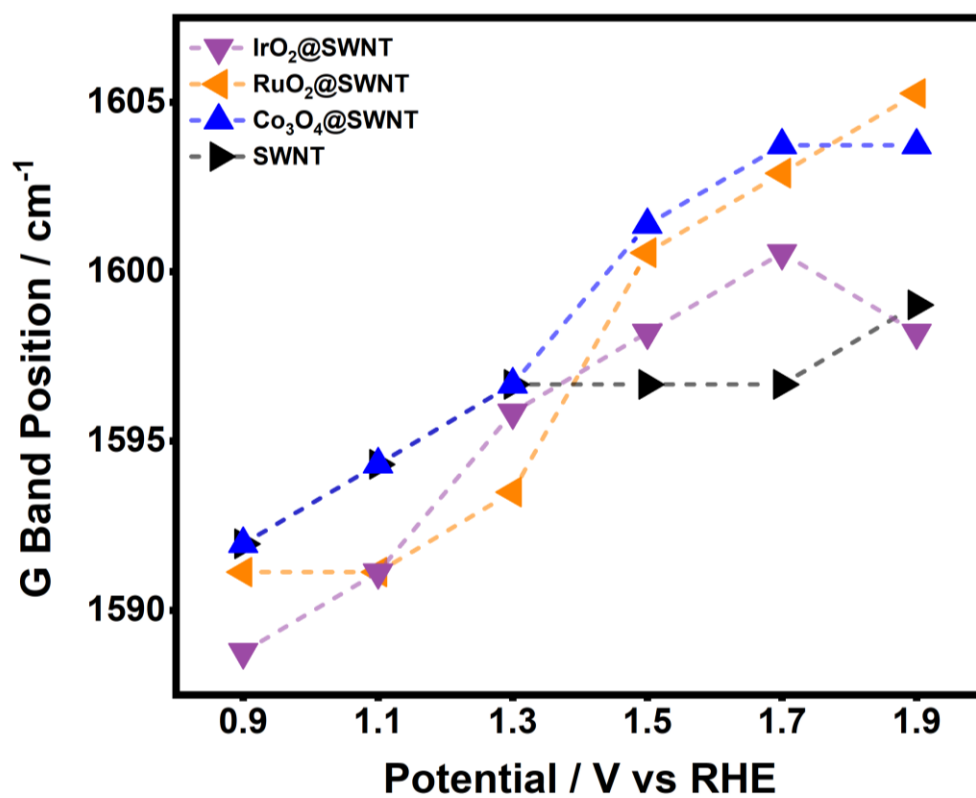

Figure S25 | G band position of each catalyst as a positive potential is applied, taken from the 785 nm Raman spectra shown in Fig. S24.

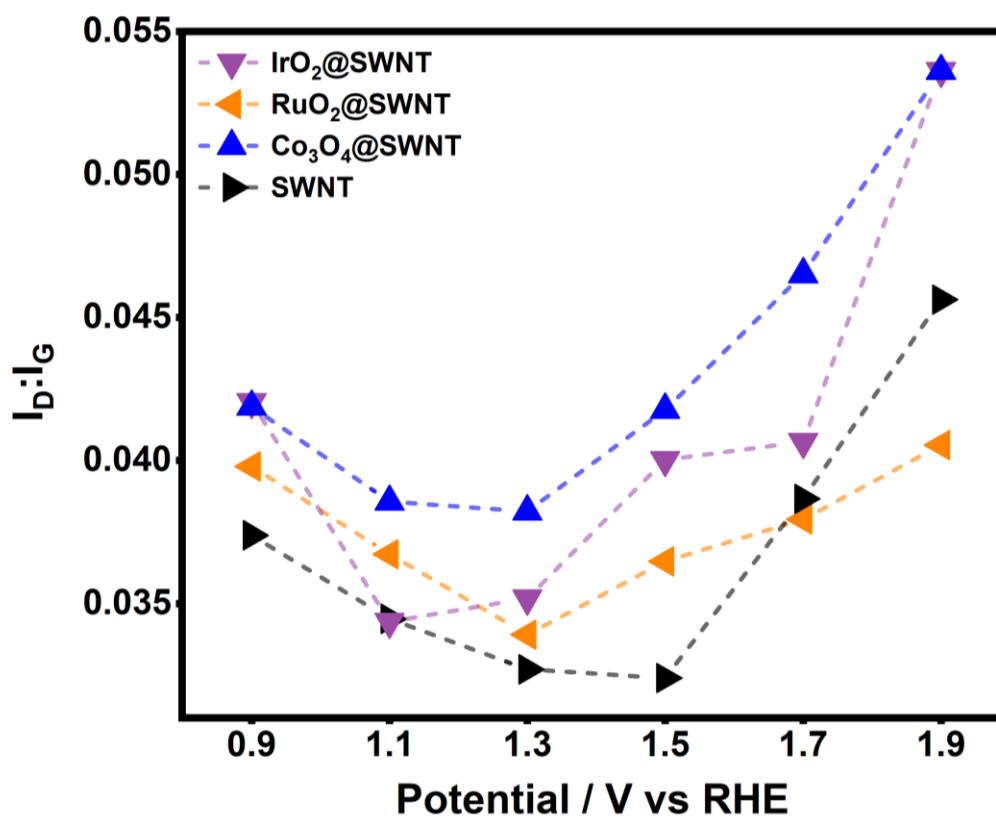

Figure S26 |  $I_D:I_G$  of  $\text{Co}_3\text{O}_4$ @SWNT,  $\text{RuO}_2$ @SWNT,  $\text{IrO}_2$ @SWNT and SWNTs as a positive potential is applied, taken from the 785 nm Raman spectra shown in Fig. S24.

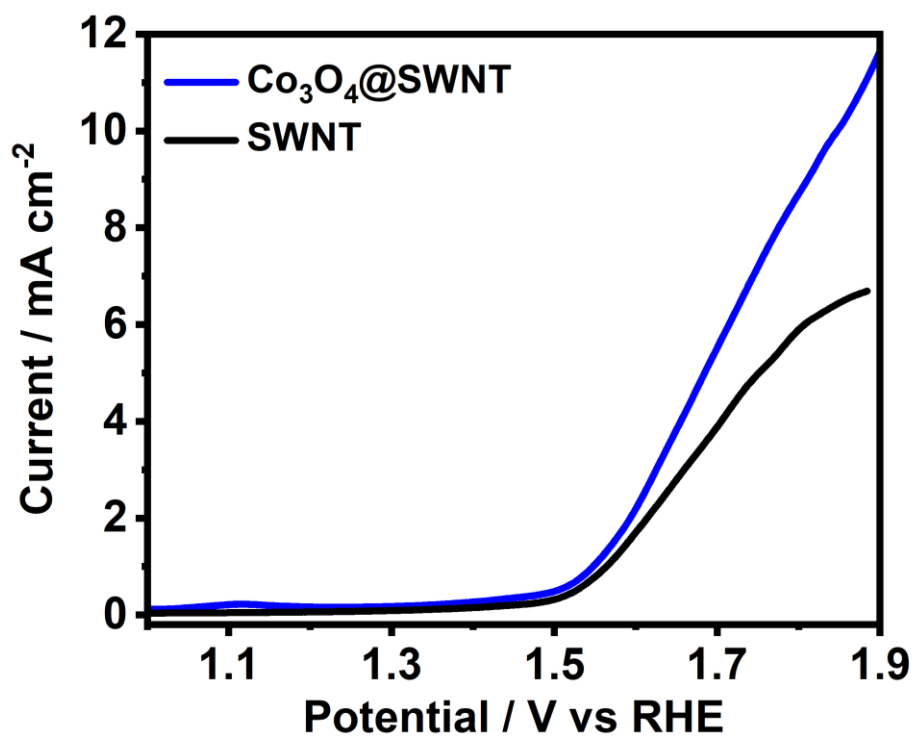

Figure S27 | LSV of  $\text{Co}_3\text{O}_4$ @SWNT and SWNTs, taken before in-situ electrochemical Raman spectroscopy.

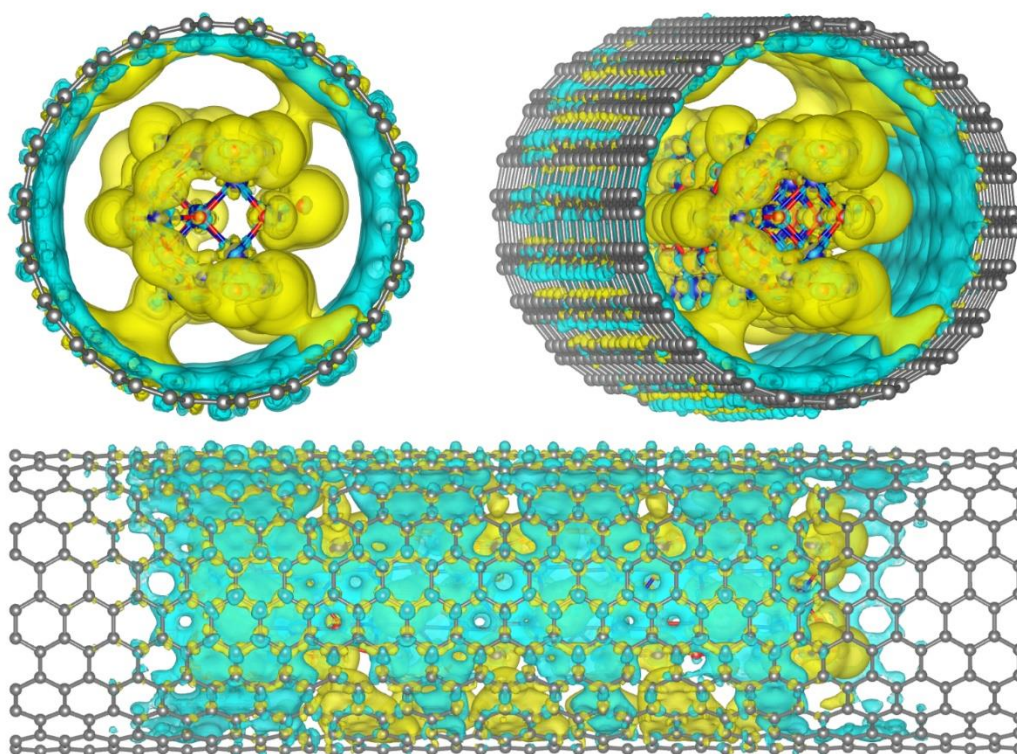

**Figure S28 | Electronic density difference after the encapsulation of  $\text{Co}_3\text{O}_4$ @SWNT (11,11).** Blue (yellow) colour represents the depletion (augmentation) of electronic density.

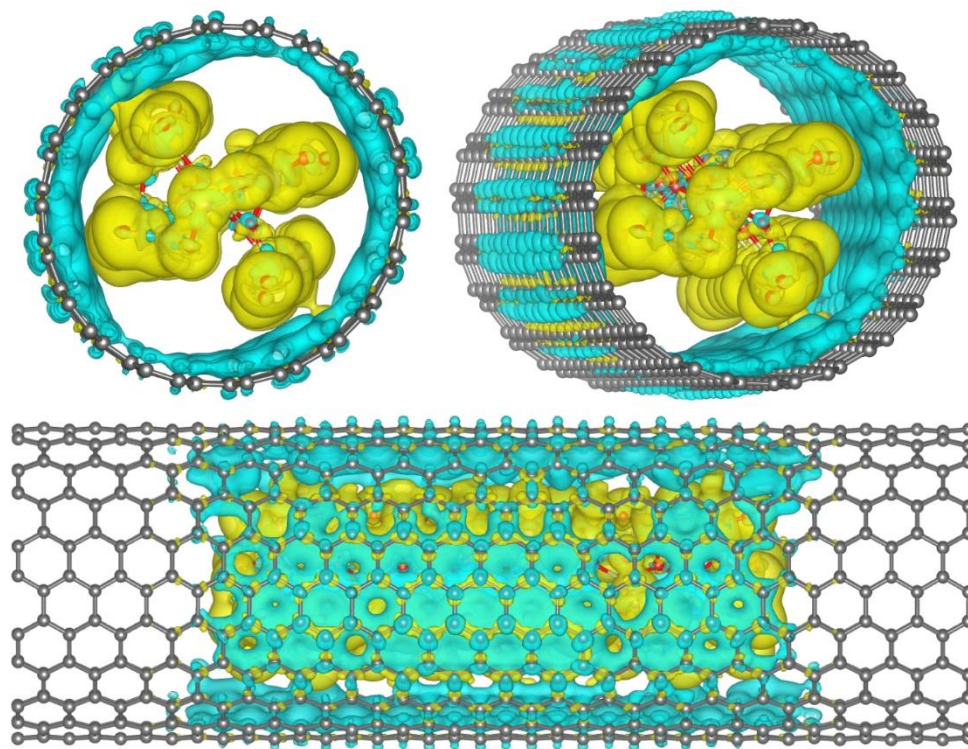

**Figure S29 | Electronic density difference after the encapsulation of  $\text{IrO}_2$ @SWNT (11,11).** Blue (yellow) colour represents the depletion (augmentation) of electronic density.

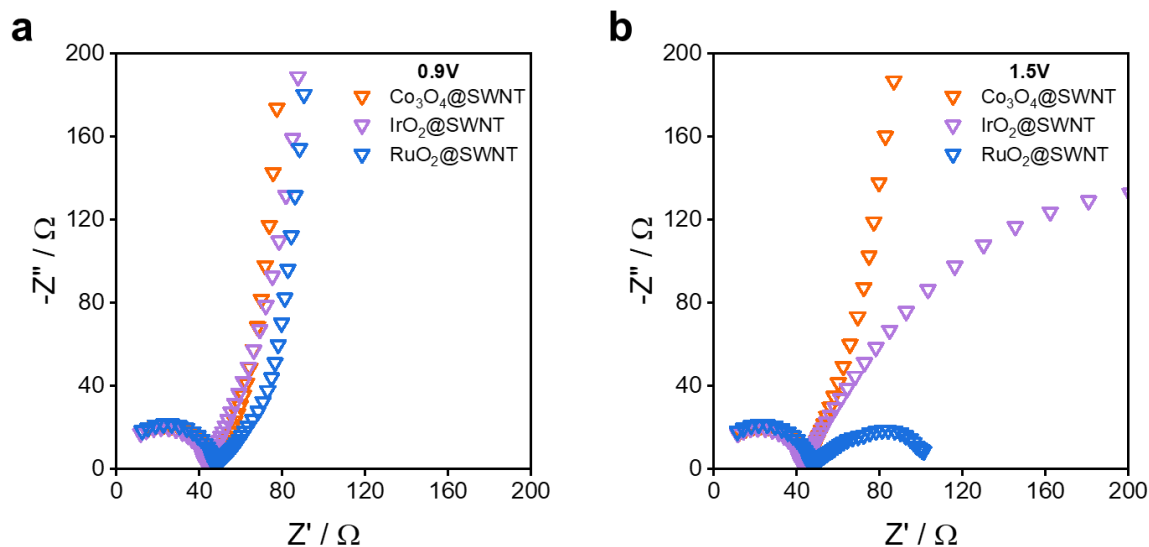

**Figure S30 | Nyquist plots of SWNT,  $\text{Co}_3\text{O}_4@\text{SWNT}$ ,  $\text{IrO}_2@\text{SWNT}$  and  $\text{RuO}_2@\text{SWNT}$ , taken at a) 0.9 V and b) 1.5 V vs RHE in  $\text{N}_2$  saturated 0.1 M KOH, using frequencies between 100 kHz and 0.1 Hz at 1600 rpm.**

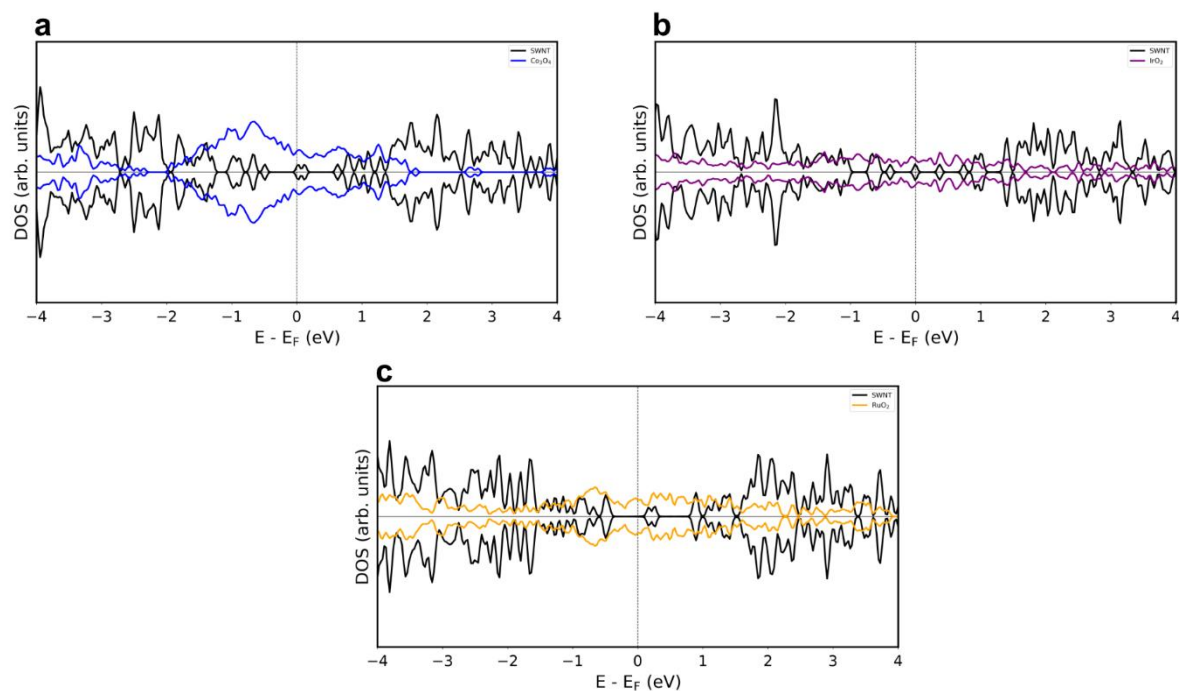

**Figure S31 | Calculated density of states of  $\text{Co}_3\text{O}_4@\text{SWNT}$ ,  $\text{IrO}_2@\text{SWNT}$  and  $\text{RuO}_2@\text{SWNT}$ .**



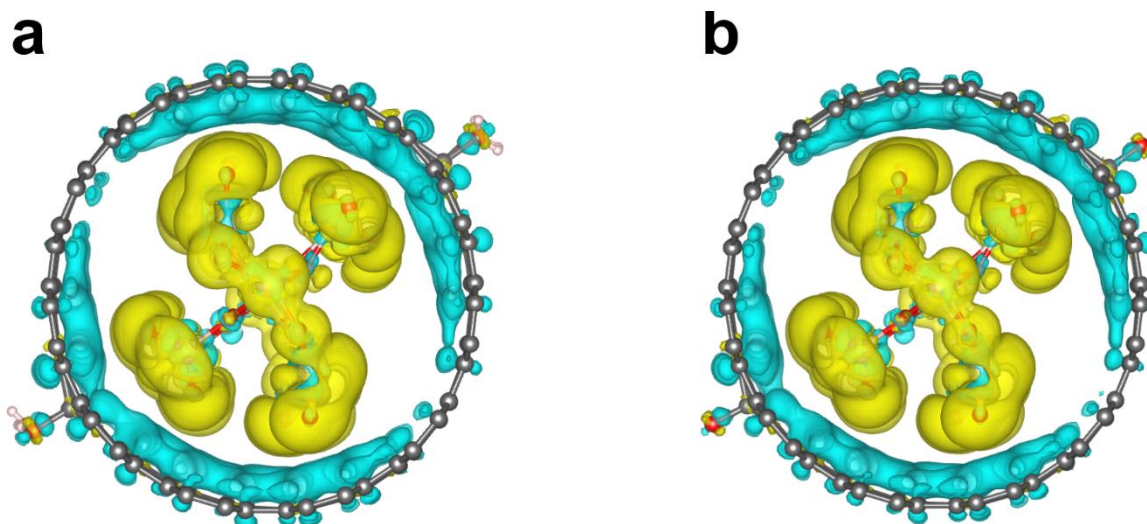

**Figure S32 | Electronic density difference after the encapsulation of RuO<sub>2</sub> on SWNT (11,11) with attached -OH groups (a) and -O groups (b).** Blue (yellow) colour represents the depletion (augmentation) of electronic density.

**Table S4 | Mulliken atomic charges of modified nanotubes**, showing charges on neighboring carbon atoms to attached oxygen groups.

| Mulliken atomic charges (a.u.) |                       |       |        |
|--------------------------------|-----------------------|-------|--------|
|                                | RuO <sub>2</sub> @CNT | -O    | -OH    |
| C1                             | 0.013                 | 0.033 | 0.003  |
| C2                             | 0.012                 | 0.051 | -0.006 |
| C3                             | 0.002                 | 0.052 | 0.039  |
| C4                             | 0.003                 | 0.044 | 0.036  |
| C5                             | 0.009                 | 0.016 | 0.008  |
| C6                             | 0.007                 | 0.025 | 0.003  |
| C7                             | 0.003                 | 0.010 | 0.009  |
| C8                             | 0.003                 | 0.013 | 0.014  |
| C9                             | 0.007                 | 0.026 | 0.023  |
| C10                            | 0.004                 | 0.017 | 0.013  |
| C11                            | 0.003                 | 0.020 | 0.009  |
| C12                            | 0.002                 | 0.017 | 0.010  |
| C13                            | 0.004                 | 0.018 | 0.004  |

### Supplementary note 3

To see how oxygen groups that would be introduced during a typical OER cycle could impact the electron density of neighbouring carbon atoms in these MO<sub>x</sub>@SWNT systems, -O and -OH groups were attached to the carbon surface. RuO<sub>2</sub>@SWNT system was chosen as a case of study as it was the material that showed the largest charge transfer in the pristine system. Mulliken atomic charges for neighbouring carbon atoms, are shown in Table S4. The highest changes of atomic charges of neighbouring carbon atoms are seen with attached -O groups, on the nearest neighbouring carbon atoms (blue shaded), while the effect on the second and third row of neighbouring C atoms is consistent but with less intensity. This increase in atomic charge could provide a lower activation barrier for a new OH<sup>-</sup> binding process, thus lowering the onset



potential. This is consistent with Tafel analysis and electrochemical stability measurements, in which the  $\text{MO}_x\text{@SWNT}$  materials improve in OER catalytic activity, accompanied by a lowering in the Tafel slope after cycling.

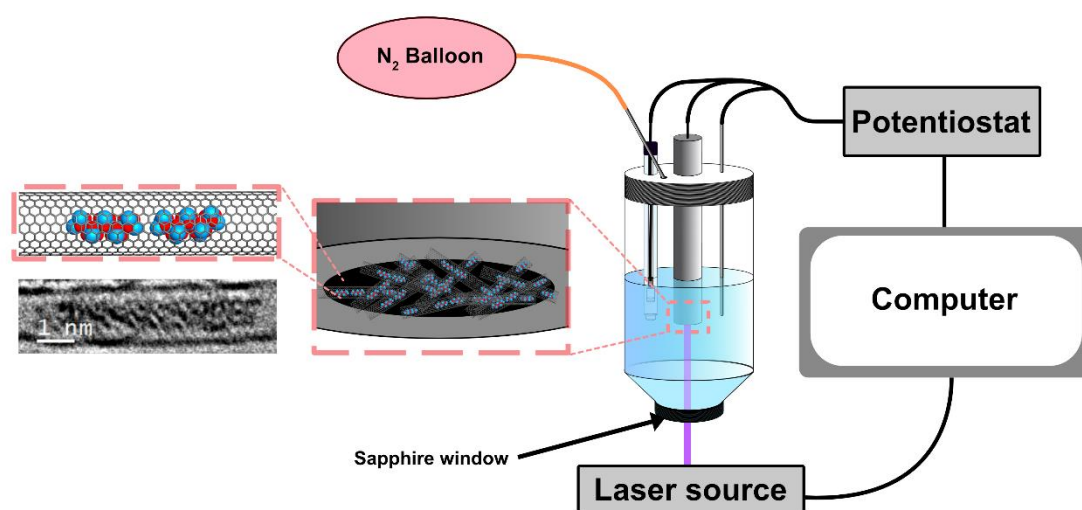

**Figure S33 | Schematic of the cell used for Raman spectroelectrochemistry measurements.** Further experimental details can be found the in the methods section.

## Supplementary References

- 1 H. Z. Geng, X. B. Zhang, S. H. Mao, A. Kleinhammes, H. Shimoda, Y. Wu and O. Zhou, *Chemical Physics Letters*, 2004, **399**, 109–113.
- 2 S. Bandow, M. Takizawa, K. Hirahara, M. Yudasaka and S. Iijima, *Chemical Physics Letters*, 2001, **337**, 48–54.
- 3 D. S. Jensen, S. S. Kanyal, N. Madaan, M. A. Vail, A. E. Dadson, M. H. Engelhard and M. R. Linford, *Surface Science Spectra*, 2013, **20**, 36–42.
- 4 T. D. Kühne, M. Iannuzzi, M. Del Ben, V. V. Rybkin, P. Seewald, F. Stein, T. Laino, R. Z. Khaliullin, O. Schütt, F. Schiffmann, D. Golze, J. Wilhelm, S. Chulkov, M. H. Bani-Hashemian, V. Weber, U. Borštnik, M. Taillefumier, A. S. Jakobovits, A. Lazzaro, H. Pabst, T. Müller, R. Schade, M. Guidon, S. Andermatt, N. Holmberg, G. K. Schenter, A. Hehn, A. Bussy, F. Belleflamme, G. Tabacchi, A. Glöß, M. Lass, I. Bethune, C. J. Mundy, C. Plessl, M. Watkins, J. VandeVondele, M. Krack and J. Hutter, *The Journal of Chemical Physics*, 2020, **152**, 194103.
- 5 J. Hutter, M. Iannuzzi, F. Schiffmann and J. VandeVondele, *WIREs Computational Molecular Science*, 2014, **4**, 15–25.
- 6 J. P. Perdew, K. Burke and M. Ernzerhof, *Phys. Rev. Lett.*, 1996, **77**, 3865–3868.
- 7 C. Hartwigsen, S. Goedecker and J. Hutter, *Phys. Rev. B*, 1998, **58**, 3641–3662.
- 8 S. Goedecker, M. Teter and J. Hutter, *Phys. Rev. B*, 1996, **54**, 1703–1710.
- 9 J. VandeVondele and J. Hutter, *J Chem Phys*, 2007, **127**, 114105.
- 10 S. Grimme, J. Antony, S. Ehrlich and H. Krieg, *The Journal of Chemical Physics*, 2010, **132**, 154104.
- 11 F. L. Sebastian, N. F. Zorn, S. Settele, S. Lindenthal, F. J. Berger, C. Bendel, H. Li, B. S. Flavel and J. Zaumseil, *J. Phys. Chem. Lett.*, 2022, **13**, 3542–3548.
- 12 N. Jiang, *Rep. Prog. Phys.*, 2015, **79**, 016501.
- 13 J. W. Jordan, K. L. Y. Fung, S. T. Skowron, C. S. Allen, J. Biskupek, G. N. Newton, U. Kaiser and A. N. Khlobystov, *Chem. Sci.*, 2021, **12**, 7377–7387.
- 14 A. A. Bolzan, C. Fong, B. J. Kennedy and C. J. Howard, *Acta Cryst B*, 1997, **53**, 373–380.
- 15 D. Böhm, M. Beetz, M. Schuster, K. Peters, A. G. Hufnagel, M. Döblinger, B. Böller, T. Bein and D. Fattakhova-Rohlfing, *Advanced Functional Materials*, 2020, **30**, 1906670.
- 16 T. Cui, X. Pan, J. Dong, S. Miao, D. Miao and X. Bao, *Nano Research*, 2018, **11**, 3132–3144.
- 17 J. Wu, Y. Xue, X. Yan, W. Yan, Q. Cheng and Y. Xie, *Nano Research*, 2012, **5**, 521–530.
- 18 J. F. Moulder, *Handbook of X-ray Photoelectron Spectroscopy: A Reference Book of Standard Spectra for Identification and Interpretation of XPS Data*, Physical Electronics Division, Perkin-Elmer Corporation, 1992.
- 19 X. Li, Z. Yang, W. Qi, Y. Li, Y. Wu, S. Zhou, S. Huang, J. Wei, H. Li and P. Yao, *Applied Surface Science*, 2016, **363**, 381–388.
- 20 Q. Huang, J. Zhang, Z. He, P. Shi, X. Qin and W. Yao, *Chemical Engineering Journal*, 2017, **313**, 1088–1098.
- 21 D. J. Morgan, *Surface and Interface Analysis*, 2015, **47**, 1072–1079.
